# Supplementary material
Source: PubMed Central journal article supplement (PMC3070190)
Supplement: NIHMS259595-supplement-1_si_001.pdf [file NIHMS259595-supplement-1_si_001.pdf]

# Silylene-mediated Polarity Reversal of Dienoates: Addition of Dienoates to Aldehydes at the $\delta$ -Position to form *trans*-Dioxasilacyclononenes

Christian C. Ventocilla and K. A. Woerpel\*

Department of Chemistry, University of California, Irvine, CA 92697-2025  
and Department of Chemistry, New York University, New York, NY 10003

## Supporting Information

### Table of Contents:

|      |                                                          |      |
|------|----------------------------------------------------------|------|
| I.   | General Experimental Considerations                      | S-1  |
| II.  | Substrate Preparation                                    | S-2  |
| III. | Formation of <i>trans</i> -Dioxasilacyclononenes         | S-2  |
| IV.  | Functionalization of <i>trans</i> -Dioxasilacyclononenes | S-6  |
| V.   | Stereochemical Proofs                                    | S-7  |
| VI.  | X-Ray Crystallography                                    | S-8  |
| VII. | Bibliography                                             | S-49 |

### I. General Experimental Considerations

Melting points were obtained using a Büchi 510 melting point apparatus and were reported uncorrected. Gas chromatography-mass spectrometry (GCMS) was performed on a Thermo-Finnigan Trace Mass Spectrometer Plus quadrupole system with a fused silica capillary column (30 m x 0.32 mm x 0.25 mm) wall-coated with DB-5 (J & W Scientific) using electron ionization (70 eV). Analytical thin layer chromatography was performed on EM reagents 0.25 mm silica gel 60-F plates. Liquid chromatography was performed using forced flow (flash chromatography) of the indicated solvent system on EM reagents silica gel (SiO<sub>2</sub>) 60 (230–400) mesh. <sup>1</sup>H NMR and <sup>13</sup>C NMR spectra were recorded at 25 °C at 400 and 100, 500 and 125, and 600 and 150 MHz, respectively, using Bruker DRX 400, DRX 500, or Bruker Avance 600 spectrometers, as indicated. The <sup>1</sup>H NMR data are reported as follows: chemical shift in ppm from internal tetramethylsilane on the  $\delta$  scale, multiplicity (s = singlet, d = doublet, t = triplet, q = quartet, qn = quintet, sext = sextet, sept = septet, m = multiplet, and br = broad), coupling constants (Hz), and integration. The <sup>13</sup>C NMR chemical shifts are reported in ppm from tetramethylsilane on the  $\delta$  scale, using tetramethylsilane as an internal standard. High resolution mass spectra were acquired on a LCT Premier Quadrupole Time of Flight Spectrometer, and were obtained by peak matching. Microanalyses were performed by Atlantic Microlabs, Norcross, GA. Cyclohexene silacyclopropane **2**<sup>1</sup> was stored and manipulated in an Innovative Technologies nitrogen atmosphere dry box. All reaction mixtures to form vinyl oxasilacyclopentenes, unless otherwise specified, were prepared in the dry box. All other reactions unless specified were performed under an atmosphere of nitrogen or argon in glassware that had been flame-dried under a stream of nitrogen or under vacuum. Solvents were distilled or filtered before use. Unless otherwise noted, all reagents and substrates were commercially available. Dienoates that were not commercially available were prepared following literature procedures.<sup>2,3</sup>

### II. Substrate Preparation

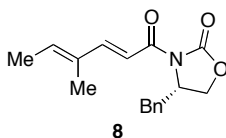

**(S)-4-Benzyl-3-((2E,4E)-4-methylhexa-2,4-dienoyl)oxazolidin-2-one (8).** To a solution (2E,4E)-4-methylhexa-2,4-dienoic acid<sup>4</sup> (0.631 g, 5.00 mmol) in benzene (20.0 mL) was added oxalyl chloride (0.86 mL, 10 mmol). The mixture was allowed to stir for 20 h. The mixture was concentrated *in vacuo* to afford (2E,4E)-4-methylhexa-2,4-dienoyl chloride, which was carried onto the next step without purification. To a cooled (−78 °C) solution of (S)-4-benzylloxazolidin-2-one (0.886 g, 5.00 mmol) in THF (25.0 mL) was added *n*-BuLi (2.00 mL, 2.50 M, 5.00 mmol). The mixture was allowed to stir at −78 °C for 10 min. A solution of the unpurified (2E,4E)-4-methylhexa-2,4-dienoyl chloride in THF (8.0 mL) was added. The mixture was allowed to warm slowly to rt over 16 h. The reaction mixture was diluted with a saturated aqueous NH<sub>4</sub>Cl (50.0 mL) and extracted with CH<sub>2</sub>Cl<sub>2</sub> (3 x 20 mL). The organic layers were combined, washed with brine, filtered, and concentrated *in vacuo* to a yellow oil. The oil was purified by flash chromatography (40:60 EtOAc:hexanes) to afford the product as a colorless solid (0.738 g, 52%): mp 99–101 °C; <sup>1</sup>H NMR (400 MHz, CDCl<sub>3</sub>) δ 7.57 (d, *J* = 15.3 Hz, 1H), 7.37 – 7.22 (m, 6H), 6.15 – 6.09 (m, 1H), 4.80 – 4.74 (m, 1H), 4.22 (t, *J* = 8.3 Hz, 1H), 4.18 (dd, *J* = 9.0, 3.1 Hz, 1H), 3.36 (dd, *J* = 13.5, 3.3 Hz, 1H), 2.82 (dd, *J* = 13.4, 9.5 Hz, 1H), 1.87 – 1.86 (m, 6H); <sup>13</sup>C NMR (100 MHz, CDCl<sub>3</sub>) δ 218.4, 166.0, 151.8, 138.6, 135.7, 134.9, 129.7, 129.2, 127.5, 114.5, 66.3, 55.7, 38.3, 15.1, 12.3; IR (thin film) 3030, 2920, 1778, 1676, 1603, 1352 cm<sup>−1</sup>; HRMS (ESI) *m/z* calcd for C<sub>17</sub>H<sub>19</sub>NNaO<sub>3</sub> (M + Na)<sup>+</sup> 308.1263, found 308.1269. Anal. Calcd for C<sub>17</sub>H<sub>19</sub>NO<sub>3</sub>: C, 71.56; H, 6.71. Found: C, 71.54; H, 6.86.

### III. Formation of *trans*-Dioxasilacyclononenes

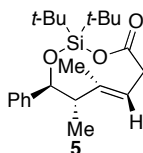

**Representative procedure for the synthesis of *trans*-dioxasilacyclononenes under thermal conditions (cyclononene 5).** To an NMR tube was added AgO<sub>2</sub>CCF<sub>3</sub> (0.0002 g, 0.001 mmol). A solution of ethyl (2E,4E)-4-methylhexa-2,4-dienoate (0.015 g, 0.10 mmol) in toluene-*d*<sub>8</sub> (0.25 mL) was added followed by a solution of cyclohexene silacyclopropane **2** (0.028 g, 0.12 mmol) and PhSiMe<sub>3</sub> (internal standard, 0.008 g, 0.05 mmol) in toluene-*d*<sub>8</sub> (0.25 mL). The mixture was allowed to sit at room temperature for 30 min. Benzaldehyde (0.031 mL, 0.30 mmol) was added, and the mixture was heated to 100 °C for 18 h. The mixture was cooled to rt, filtered through a plug of SiO<sub>2</sub>, and concentrated *in vacuo* to afford an oil. <sup>1</sup>H NMR spectroscopy and GCMS of the unpurified reaction mixture revealed formation of the product as a single diastereomer. The oil was purified by flash chromatography (10:90 EtOAc:hexanes) to afford cyclononene **5** a colorless solid (0.029 g, 77%).

**Representative procedure for the synthesis of *trans*-dioxasilacyclononenes under Lewis acid conditions (cyclononene 5).** This reaction can be scaled up (see the synthesis of **21**, p. S-6). To an NMR tube was added AgO<sub>2</sub>CCF<sub>3</sub> (0.0002 g, 0.001 mmol). A solution of ethyl (2E,4E)-4-methylhexa-2,4-dienoate (0.015 g, 0.10 mmol) in toluene-*d*<sub>8</sub> (0.25 mL) was added followed by a solution of cyclohexene silacyclopropane **2** (0.028 g, 0.12 mmol) and PhSiMe<sub>3</sub> (internal standard, 0.008 g, 0.05 mmol) in toluene-*d*<sub>8</sub> (0.25 mL). The mixture was allowed to sit at room temperature for 30 min. Benzaldehyde (0.031 mL, 0.30 mmol) was added followed by SnBr<sub>4</sub> (0.004 g, 0.01 mmol). After the mixture was allowed to sit for 3 h, it was filtered through a plug of SiO<sub>2</sub> and concentrated *in vacuo* to afford an oil. <sup>1</sup>H NMR spectroscopy and GCMS of the unpurified reaction mixture revealed formation

of the product as a single diastereomer. The oil was purified by flash chromatography (10:90 EtOAc:hexanes) to afford cyclononene **5** a colorless solid (0.014 g, 37%): mp 103-105 °C; <sup>1</sup>H NMR (500 MHz, CDCl<sub>3</sub>) δ 7.42 – 7.35 (m, 5H), 5.60 (dd, *J* = 10.8, 5.6 Hz, 1H), 4.65 (d, *J* = 9.6 Hz, 1H), 3.55 (dd, *J* = 17.1, 10.8 Hz, 1H), 3.20 (dd, *J* = 17.1, 5.8 Hz, 1H), 2.53 – 2.47 (m, 1H), 1.74 (s, 3H), 1.08 (s, 9H), 1.04 (s, 9H), 0.77 (d, *J* = 7.0 Hz, 3H); <sup>13</sup>C NMR (125 MHz, CDCl<sub>3</sub>) δ 169.5, 142.3, 140.7, 128.2, 127.6, 126.7, 121.1, 79.5, 51.9, 36.0, 28.0, 27.4, 21.0, 20.9, 13.7, 11.6; IR (thin film) 3064, 3032, 2937, 1728, 1471, 1203 cm<sup>-1</sup>; HRMS (ESI) *m/z* calcd for C<sub>22</sub>H<sub>34</sub>NaO<sub>3</sub>Si (M + Na)<sup>+</sup> 397.2175, found 397.2177. Anal. Calcd for C<sub>22</sub>H<sub>34</sub>O<sub>3</sub>Si: C, 70.54; H, 9.15. Found: C, 70.77; H, 9.12.

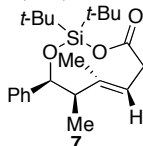

**Cyclononene 7.** The representative procedure for the formation of *trans*-dioxasilacyclononene was followed using ethyl (2*E*,4*Z*)-4-methylhexa-2,4-dienoate (0.015 g, 0.10 mmol). The reaction under thermal conditions afforded cyclononene **7** as a colorless oil (0.025 g, 67%): <sup>1</sup>H NMR (400 MHz, CDCl<sub>3</sub>) δ 7.38 – 7.25 (m, 5H), 5.49 (dd, *J* = 11.1, 5.6 Hz, 1H), 5.24 (d, *J* = 2.0 Hz, 1H), 3.48 (dd, *J* = 16.9, 11.1 Hz, 1H), 3.18 (dd, *J* = 16.8, 5.6 Hz, 1H), 2.49-2.43 (m, 1H), 1.91 (s, 3H), 1.17 (s, 9H), 0.96 (s, 9H), 0.80 (d, *J* = 6.9 Hz, 3H); <sup>13</sup>C NMR (100 MHz, CDCl<sub>3</sub>) δ 169.4, 142.7, 142.2, 128.3, 127.0, 125.5, 117.4, 75.4, 49.7, 36.2, 28.3, 28.0, 21.7, 21.3, 18.1, 9.9; IR (thin film) 3062, 2970, 1730, 1473, 1369, 654 cm<sup>-1</sup>; HRMS (ESI) *m/z* calcd for C<sub>22</sub>H<sub>34</sub>NaO<sub>3</sub>Si (M + Na)<sup>+</sup> 397.2175, found 397.2181. Anal. Calcd for C<sub>22</sub>H<sub>34</sub>O<sub>3</sub>Si: C, 70.54; H, 9.15. Found: C, 70.53; H, 9.31.

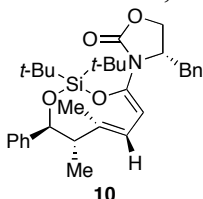

**Cyclononene 10.** The representative procedure for the formation of *trans*-dioxasilacyclononene was followed using (*S*)-4-benzyl-3-((2*E*,4*E*)-4-methylhexa-2,4-dienyl)oxazolidin-2-one (0.029 g, 0.10 mmol) and AgO<sub>2</sub>CCF<sub>3</sub> (0.001 g, 0.005 mmol). The reaction thermal conditions afforded cyclononene **10** as a colorless solid (0.039 g, 73%). Cyclononene **10** appears as 1:1 mixture of isomers by <sup>1</sup>H and <sup>13</sup>C NMR spectroscopic analysis at room temperature. GCMS analysis of cyclononene **10** shows a mixture diastereomers (96:4 dr) that is consistent with the diastereoselectivity found with silylene transfer to (*S,E*)-4-benzyl-3-but-2-enoyloxazolidin-2-one. Relative configuration of cyclononene **10** was determined by X-ray crystallography. We hypothesized that cyclononene **10** exists in two equal energy conformation at room temperature. <sup>1</sup>H NMR spectroscopy of cyclononene **10** at elevated temperatures shows the initially 1:1 mixture of isomers coalesce to one isomer: <sup>1</sup>H NMR (400 MHz, tol-*d*<sub>8</sub>, 100 °C) δ 7.26 – 6.95 (m, 10H), 5.83 (s, 1H), 5.62 (br s, 1H), 4.60 – 4.50 (m, 1H), 4.19 (br s, 1H), 3.72 – 3.60 (m, 2H), 3.13 (dd, *J* = 13.9, 3.8 Hz, 1H), 2.54 (dd, *J* = 13.8, 9.5 Hz, 1H), 2.21 – 2.17 (m, 1H), 1.88 (s, 3H), 1.11 (s, 9H), 1.04 (s, 9H), 0.96 – 0.94 (m, 3H). Cooling the sample back down to room temperature reverts it back to a 1:1 mixture: mp 154-155 °C; <sup>1</sup>H NMR (400 MHz, C<sub>6</sub>D<sub>6</sub>) δ 7.28 – 6.90 (m, 20H), 6.03 (s, 1H), 5.94 (s, 1H), 5.83 (s, 1H), 5.66 (s, 1H), 4.69 (d, *J* = 9.7 Hz, 1H), 4.47 (d, *J* = 9.6 Hz, 1H), 4.35 – 4.31 (m, 1H), 3.99 – 3.94 (m, 1H), 3.55 – 3.45 (m, 4H), 3.11 (dd, *J* = 13.5, 3.6 Hz, 1H), 3.04 (dd, *J* = 13.6, 3.6 Hz, 1H), 2.52 – 2.37 (m, 3H), 2.25 – 2.17 (m, 1H), 2.02 (s, 3H), 1.89 (s, 3H), 1.19 (s, 9H), 1.15 (s, 9H), 1.11 (s, 9H), 1.06 (s, 9H), 0.88 (d, *J* = 6.9 Hz, 3H), 0.68 (d, *J* = 7.0 Hz, 3H); <sup>13</sup>C NMR (100 MHz, C<sub>6</sub>D<sub>6</sub>) δ 155.1, 154.8, 149.1, 143.3, 142.9, 142.1, 141.0, 140.3, 136.1, 136.0, 129.52, 129.47, 129.10, 129.05, 128.52, 128.50, 128.2, 127.9, 127.33, 127.30, 127.2, 126.9, 123.0, 122.6, 115.7, 101.9,

101.7, 88.2, 79.9, 66.0, 65.8, 57.3, 55.9, 52.4, 49.5, 39.0, 38.6, 28.84, 28.81, 28.6, 28.3, 24.8, 22.7, 21.8, 21.2, 14.8, 13.52, 13.50; IR (thin film) 2926, 2856, 1768, 1643, 1456, 1092  $\text{cm}^{-1}$ ; HRMS (ESI)  $m/z$  calcd for  $\text{C}_{32}\text{H}_{43}\text{NNaO}_4\text{Si}$  ( $M + \text{Na}$ )<sup>+</sup> 556.2859, found 556.2860. Anal. Calcd for  $\text{C}_{32}\text{H}_{43}\text{NO}_4\text{Si}$ : C, 72.00; H, 8.12. Found: C, 72.20; H, 8.19.

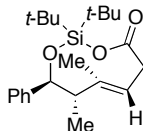

(-)-5

**Cyclononene (-)-5.** To a solution of cyclononene **10** (0.037 g, 0.070 mmol) in ether (0.7 mL) was added a solution of HCl (1.0 mL, 1.0 M, 1.0 mmol). The mixture was stirred for 1 h. The mixture was diluted with ether (2.0 mL). The layers were separated, and the organic layer was washed with a saturated aqueous solution of  $\text{NaHCO}_3$ , washed with brine, dried over  $\text{MgSO}_4$ , filtered, and concentrated *in vacuo* to afford a colorless solid (0.026g, 100%):  $[\alpha]_{\text{D}}^{25} - 36.6^\circ$  ( $c$  1.00,  $\text{CH}_2\text{Cl}_2$ );  $^1\text{H}$  and  $^{13}\text{C}$  NMR spectroscopic data matched those reported above.

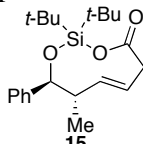

15

**Cyclononene 15.** The representative procedure for the formation of *trans*-dioxasilacyclononene was followed using ethyl sorbate (0.014 g, 0.10 mmol). The reaction mixture was heated to 100 °C for 5 d to afford cyclononene **15** as a colorless solid (0.021 g, 59%): mp 100-102 °C;  $^1\text{H}$  NMR (500 MHz,  $\text{CDCl}_3$ )  $\delta$  7.37 – 7.28 (m, 5H), 5.69 (ddd,  $J = 15.2, 9.4, 5.9$  Hz, 1H), 5.47 (dd,  $J = 15.2, 9.8$  Hz, 1H), 4.52 (d,  $J = 9.5$  Hz, 1H), 3.22 – 3.19 (m, 2H), 2.36 (tq,  $J = 9.7, 6.6$  Hz, 1H), 1.01 (s, 18H), 0.80 (d,  $J = 6.7$  Hz, 3H);  $^{13}\text{C}$  NMR (125 MHz,  $\text{CDCl}_3$ )  $\delta$  169.3, 142.0, 140.3, 128.2, 127.7, 126.8, 125.4, 81.4, 47.4, 40.7, 28.0, 27.2, 20.74, 20.68, 15.9; IR (thin film) 3034, 2935, 1730, 1471, 1093, 972  $\text{cm}^{-1}$ ; HRMS (ESI)  $m/z$  calcd for  $\text{C}_{21}\text{H}_{32}\text{NaO}_3\text{Si}$  ( $M + \text{Na}$ )<sup>+</sup> 383.2018, found 383.2025. Anal. Calcd for  $\text{C}_{21}\text{H}_{32}\text{O}_3\text{Si}$ : C, 69.95; H, 8.95. Found: C, 70.05; H, 9.01.

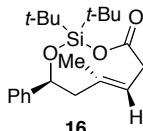

16

**Cyclononene 16.** The representative procedure for the formation of *trans*-dioxasilacyclononene was followed using ethyl (*E*)-4-methylpenta-2,4-dienoate (0.014 g, 0.10 mmol). The reaction mixture was heated to 100 °C for 2 d to afford cyclononene **16** as a colorless solid (0.019 g, 53%): mp 83-85 °C;  $^1\text{H}$  NMR (500 MHz,  $\text{CDCl}_3$ )  $\delta$  7.43 – 7.32 (m, 5H), 5.54 (ddd,  $J = 11.2, 5.5, 0.6$  Hz, 1H), 5.13 (dd,  $J = 9.6, 3.6$  Hz, 1H), 3.49 (dd,  $J = 17.0, 11.2$  Hz, 1H), 3.19 (dd,  $J = 17.0, 5.5$  Hz, 1H), 2.41 – 2.34 (m, 2H), 1.88 (s, 3H), 1.16 (s, 9H), 1.05 (s, 9H);  $^{13}\text{C}$  NMR (125 MHz,  $\text{CDCl}_3$ )  $\delta$  169.2, 144.1, 137.0, 128.4, 127.3, 125.1, 121.6, 74.2, 51.8, 36.2, 28.1, 27.5, 21.1, 21.0, 16.2; IR (thin film) 3030, 2937, 1730, 1473, 1201, 1086  $\text{cm}^{-1}$ ; HRMS (ESI)  $m/z$  calcd for  $\text{C}_{21}\text{H}_{32}\text{NaO}_3\text{Si}$  ( $M + \text{Na}$ )<sup>+</sup> 383.2018, found 383.2020. Anal. Calcd for  $\text{C}_{21}\text{H}_{32}\text{O}_3\text{Si}$ : C, 69.95; H, 8.95. Found: C, 69.78; H, 9.08.

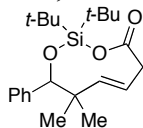

17

**Cyclononene 17.** The representative procedure for the formation of *trans*-dioxasilacyclononene was followed using ethyl (*E*)-5-methylhexa-2,4-dienoate (0.015 g, 0.10 mmol). The reaction mixture was heated to 100 °C for 10 d to afford cyclononene **17** as a colorless solid (0.014 g, 38%): mp 104-106 °C; <sup>1</sup>H NMR (500 MHz, CDCl<sub>3</sub>) δ 7.35 – 7.27 (m, 5H), 5.67 (d, *J* = 15.6 Hz, 1H), 5.58 (ddd, *J* = 15.4, 9.4, 5.5 Hz, 1H), 4.76 (s, 1H), 3.27 – 3.20 (m, 2H), 1.09 (s, 9H), 0.95 (s, 9H), 0.93 (s, 3H), 0.93 (s, 3H); <sup>13</sup>C NMR (125 MHz, CDCl<sub>3</sub>) δ 169.5, 146.0, 139.5, 127.7, 127.5, 127.4, 121.1, 82.1, 42.9, 41.0, 28.0, 27.4, 25.3, 21.0, 20.9, 16.5; IR (thin film) 3030, 2935, 2862, 1732, 1473, 1095 cm<sup>-1</sup>; HRMS (ESI) *m/z* calcd for C<sub>22</sub>H<sub>34</sub>NaO<sub>3</sub>Si (M + Na)<sup>+</sup> 397.2175, found 397.2179. Anal. Calcd for C<sub>22</sub>H<sub>34</sub>O<sub>3</sub>Si: C, 70.54 H, 9.15. Found: C, 70.70; H, 9.21.

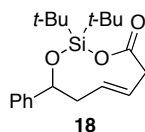

**Cyclononene 18.** The representative procedure for the formation of *trans*-dioxasilacyclononene was followed using ethyl (*E*)-penta-2,4-dienoate (0.013 g, 0.10 mmol). The reaction mixture was heated to 100 °C for 5 d to afford cyclononene **18** as a colorless oil (0.013 g, 37%): <sup>1</sup>H NMR (500 MHz, CDCl<sub>3</sub>) δ 7.37 – 7.27 (m, 5H), 5.75 (ddd, *J* = 15.1, 10.7, 4.3 Hz, 1H), 5.66 (dt, *J* = 15.2, 7.5 Hz, 1H), 5.04 (dd, *J* = 10.9, 2.4 Hz, 1H), 3.29 (s, 1H), 3.27 (s, 1H), 2.54 – 2.50 (m, 1H), 2.22 (dt, *J* = 12.6, 10.7 Hz, 1H), 1.09 (s, 9H), 1.02 (s, 9H); <sup>13</sup>C NMR (125 MHz, CDCl<sub>3</sub>) δ 169.2, 143.9, 133.9, 128.5, 127.9, 127.4, 125.2, 75.6, 44.7, 40.9, 28.1, 27.5, 21.0, 20.9; IR (thin film) 3032, 2947, 1730, 1471, 1230, 827 cm<sup>-1</sup>; HRMS (ESI) *m/z* calcd for C<sub>20</sub>H<sub>30</sub>NaO<sub>3</sub>Si (M + Na)<sup>+</sup> 369.1862, found 369.1859. Anal. Calcd for C<sub>20</sub>H<sub>30</sub>O<sub>3</sub>Si: C, 69.32; H, 8.73. Found: C, 69.06; H, 8.75.

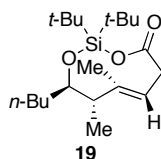

**Cyclononene 19.** The representative procedure for the formation of *trans*-dioxasilacyclononene was followed using valeraldehyde (0.026 g, 0.30 mmol). Under thermal conditions, the reaction mixture was heated to 100 °C for 18 h to afford cyclononene **19** as a colorless oil (0.026 g, 72%). Under Lewis acid catalysis, the reaction mixture was allowed to sit at rt for 3 h, and cyclononene **19** was isolated as a colorless oil (0.013 g, 37%): <sup>1</sup>H NMR (500 MHz, CDCl<sub>3</sub>) δ 5.33 (dd, *J* = 10.7, 5.9 Hz, 1H), 3.89 (ddd, *J* = 9.7, 4.6, 3.5 Hz, 1H), 3.40 (dd, *J* = 17.0, 10.7 Hz, 1H), 3.04 (dd, *J* = 17.1, 5.9 Hz, 1H), 2.31 (dq, *J* = 9.7, 7.0 Hz, 1H), 1.73-1.66 (m, 2H), 1.57 (s, 3H), 1.55-1.33 (m, 4H), 1.05 (s, 9H), 1.02 (s, 9H), 0.98 (d, *J* = 6.9 Hz, 3H), 0.93 (t, *J* = 7.3 Hz, 3H); <sup>13</sup>C NMR (125 MHz, CDCl<sub>3</sub>) δ 169.7, 141.5, 120.0, 76.3, 47.8, 35.8, 34.1, 28.2, 27.5, 25.6, 23.2, 21.4, 21.2, 14.1, 13.8, 11.5; IR (thin film) 2935, 2862, 1730, 1471, 1082, 976 cm<sup>-1</sup>; HRMS (ESI) *m/z* calcd for C<sub>20</sub>H<sub>38</sub>NaO<sub>3</sub>Si (M + Na)<sup>+</sup> 377.2488, found 377.2480. Anal. Calcd for C<sub>20</sub>H<sub>38</sub>O<sub>3</sub>Si: C, 67.74; H, 10.80. Found: C, 67.94; H, 11.01.

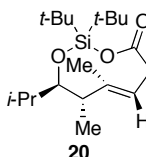

**Cyclononene 20.** The representative procedure for the formation of *trans*-dioxasilacyclononene was followed using isobutyraldehyde (0.022 g, 0.30 mmol). Under thermal conditions, the reaction mixture was heated to 130 °C for 3 d in a flame sealed NMR tube to afford cyclononene **20** as a colorless solid (0.025 g, 73%). Under Lewis acid catalysis, the reaction mixture was allowed to sit at rt for 18 h to afford cyclononene **20** as a colorless solid (0.014 g, 40%): mp 68-71 °C; <sup>1</sup>H NMR (500 MHz, CDCl<sub>3</sub>) δ

5.35 (ddd,  $J = 10.6, 5.9, 1.4$  Hz, 1H), 3.87 (dd,  $J = 9.9, 1.8$  Hz, 1H), 3.38 (dd,  $J = 17.0, 10.6$  Hz, 1H), 3.02 (dd,  $J = 17.0, 5.9$  Hz, 1H), 2.39 (dq,  $J = 9.8, 6.9$  Hz, 1H), 1.92 (dtd,  $J = 13.8, 6.9, 1.8$  Hz, 1H), 1.59 (d,  $J = 1.4$  Hz, 3H), 1.11 (d,  $J = 7.0$  Hz, 3H), 1.08 (s, 9H), 1.05 (s, 9H), 0.97 (d,  $J = 6.9$  Hz, 3H), 0.92 (d,  $J = 6.8$  Hz, 3H);  $^{13}\text{C}$  NMR (100 MHz,  $\text{CDCl}_3$ )  $\delta$  169.7, 142.2, 120.3, 81.4, 47.2, 35.9, 30.4, 28.6, 27.9, 22.3, 22.1, 21.9, 14.4, 14.2, 11.8; IR (thin film) 2970, 2862, 1730, 1471, 1205, 1068  $\text{cm}^{-1}$ ; HRMS (ESI)  $m/z$  calcd for  $\text{C}_{19}\text{H}_{36}\text{NaO}_3\text{Si}$  ( $\text{M} + \text{Na}$ ) $^+$  363.2332, found 363.2328. Anal. Calcd for  $\text{C}_{19}\text{H}_{36}\text{O}_3\text{Si}$ : C, 67.01; H, 10.65. Found: C, 67.27; H, 10.62.

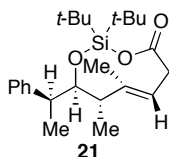

**Cyclononene 21.** The representative procedure for the formation of *trans*-dioxasilacyclononene under thermal conditions was followed using ( $\pm$ )-2-phenylpropanal (0.040 g, 0.30 mmol). Under thermal conditions, the reaction mixture was heated to 130  $^\circ\text{C}$  for 5 d in a flame sealed NMR tube to afford cyclononene **21** as a colorless solid (0.029 g, 72%). Under Lewis acid catalysis: to  $\text{AgO}_2\text{CCF}_3$  (0.004 g, 0.02 mmol) was added a solution of ethyl (*2E,4E*)-4-methylhexa-2,4-dienoate (0.308 g, 2.00 mmol) in toluene (10.0 mL), and cyclohexene silacyclopropane **2** (0.561 g, 2.5 mmol) was added dropwise. The mixture was allowed to stir at room temperature for 30 min. ( $\pm$ )-2-Phenylpropanal (0.805 g, 6.00 mmol) was added followed by  $\text{SnBr}_4$  (0.088 g, 0.20 mmol). After the mixture was allowed to stir for 18 h, 60 mL of a saturated aqueous solution of  $\text{NaHCO}_3$  was added. The layers were separated, and the aqueous layer was extracted with  $\text{CH}_2\text{Cl}_2$  (3 x 25 mL). The organic layers were combined, washed with brine, filtered, and concentrated *in vacuo* to afford an oil.  $^1\text{H}$  NMR spectroscopy and GCMS of the unpurified reaction mixture revealed formation of a single diastereomer. The oil was purified by flash chromatography (10:90 EtOAc:hexanes) to afford the product a colorless solid (0.754 g, 94%). The relative configuration of cyclononene **21** was determined by X-ray crystallography: mp 101-104  $^\circ\text{C}$ ;  $^1\text{H}$  NMR (400 MHz,  $\text{CDCl}_3$ )  $\delta$  7.44 – 7.16 (m, 5H), 5.41 (ddd,  $J = 10.2, 6.3, 1.2$  Hz, 1H), 4.20 (dd,  $J = 9.8, 1.7$  Hz, 1H), 3.38 (dd,  $J = 17.2, 10.4$  Hz, 1H), 3.13 (qd,  $J = 7.1, 1.5$  Hz, 1H), 3.02 (dd,  $J = 17.2, 6.1$  Hz, 1H), 2.54 (dq,  $J = 9.8, 6.9$  Hz, 1H), 1.61 (d,  $J = 1.3$  Hz, 3H), 1.37 (d,  $J = 7.1$  Hz, 3H), 1.15 (d,  $J = 6.9$  Hz, 3H), 1.02 (s, 9H), 0.49 (s, 9H);  $^{13}\text{C}$  NMR (100 MHz,  $\text{CDCl}_3$ )  $\delta$  169.5, 144.9, 142.0, 128.6, 128.5, 126.5, 120.6, 82.4, 47.7, 40.6, 35.8, 28.0, 27.6, 21.8, 21.6, 14.9, 11.8, 10.5; IR (thin film) 2937, 2860, 1728, 1471, 1207, 1092  $\text{cm}^{-1}$ ; HRMS (ESI)  $m/z$  calcd for  $\text{C}_{24}\text{H}_{38}\text{NaO}_3\text{Si}$  ( $\text{M} + \text{Na}$ ) $^+$  425.2488, found 425.2485. Anal. Calcd for  $\text{C}_{24}\text{H}_{38}\text{O}_3\text{Si}$ : C, 71.59; H, 9.51. Found: C, 71.36; H, 9.51.

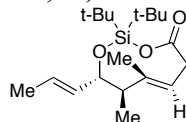

**Cyclononene 22.** The representative procedure for the formation of *trans*-dioxasilacyclononene was followed using crotonaldehyde (0.021 g, 0.30 mmol). Under thermal conditions, the reaction mixture was heated to 100  $^\circ\text{C}$  for 18 h to afford cyclononene **22** as a colorless oil (0.027 g, 80%):  $^1\text{H}$  NMR (400 MHz,  $\text{CDCl}_3$ )  $\delta$  5.69 – 5.60 (m, 1H), 5.44 – 5.35 (m, 2H), 4.06 (dd,  $J = 9.3, 7.3$  Hz, 1H), 3.42 (dd,  $J = 17.1, 10.7$  Hz, 1H), 3.07 (dd,  $J = 17.2, 6.0$  Hz, 1H), 2.22 – 2.16 (m, 1H), 1.73 (dd,  $J = 6.5, 1.0$  Hz, 3H), 1.58 (s, 3H), 1.03 (s, 9H), 1.02 (s, 9H), 0.94 (d,  $J = 7.0$  Hz, 3H);  $^{13}\text{C}$  NMR (100 MHz,  $\text{CDCl}_3$ )  $\delta$  169.8, 141.0, 132.1, 127.2, 120.6, 78.1, 50.1, 36.0, 28.2, 27.7, 21.2, 21.1, 17.9, 13.9, 11.6; IR (thin film) 2937, 2862, 1732, 1473, 1201, 1090  $\text{cm}^{-1}$ ; HRMS (ESI)  $m/z$  calcd for  $\text{C}_{19}\text{H}_{34}\text{NaO}_3\text{Si}$  ( $\text{M} + \text{Na}$ ) $^+$  361.2175, found 361.2179. Anal. Calcd for  $\text{C}_{19}\text{H}_{34}\text{O}_3\text{Si}$ : C, 67.40; H, 10.12. Found: C, 67.82; H, 10.25.

#### IV. Functionalization of *trans*-Dioxasilacyclononenes

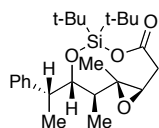

**Epoxide 23'.** To a solution of cyclononene **21** (0.040 g, 0.10 mmol) in  $\text{CH}_2\text{Cl}_2$  (1.0 mL) was added *m*-CPBA (0.074 g, 70% wt, 0.30 mmol). The mixture stirred for 30 min, and then was concentrated *in vacuo*. The residue was purified by flash chromatography (10:90 EtOAc:hexanes) to afford the product as a colorless solid (0.029 g, 68%): mp 155-158 °C;  $^1\text{H}$  NMR (400 MHz,  $\text{CDCl}_3$ )  $\delta$  7.39 – 7.18 (m, 5H), 4.37 (dd,  $J = 10.3, 1.7$  Hz, 1H), 3.14 – 3.09 (m, 3H), 2.47 (dd,  $J = 17.7, 11.3$  Hz, 1H), 1.51 – 1.45 (m, 1H), 1.31 (d,  $J = 7.2$  Hz, 3H), 1.31 (s, 3H), 1.19 (d,  $J = 6.9$  Hz, 3H), 1.06 (s, 9H), 0.55 (s, 9H);  $^{13}\text{C}$  NMR (100 MHz,  $\text{CDCl}_3$ )  $\delta$  166.9, 144.2, 128.7, 128.6, 126.7, 82.2, 62.5, 61.8, 47.3, 40.8, 36.9, 28.0, 27.5, 21.59, 21.57, 13.6, 12.4, 10.2; IR (thin film) 2937, 2862, 1738, 1473, 1240, 1092  $\text{cm}^{-1}$ ; HRMS (ESI)  $m/z$  calcd for  $\text{C}_{24}\text{H}_{38}\text{NaO}_4\text{Si}$  ( $\text{M} + \text{Na}$ ) $^+$  441.2437, found 441.2436. Anal. Calcd for  $\text{C}_{24}\text{H}_{38}\text{O}_4\text{Si}$ : C, 68.86; H, 9.15. Found: C, 68.99; H, 9.22.

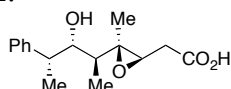

**Acid 23.** To epoxide **23'** (0.057 g, 0.14 mmol) was added *n*-Bu<sub>4</sub>NF (1.40 mL, 1.0 M in THF, 1.4 mmol). The mixture stirred for 3 d, and then it was diluted with 5 mL of H<sub>2</sub>O followed by 1 mL of 1.0 N HCl solution. The mixture was extracted with MTBE (3 x 5 mL). The organic layers were combined, washed with brine, dried over MgSO<sub>4</sub>, filtered, and concentrated *in vacuo* to afford an oil. The oil was purified by flash chromatography (10:90 MeOH: $\text{CH}_2\text{Cl}_2$ ) to afford the product as a colorless oil (0.023 g, 58%):  $^1\text{H}$  NMR (400 MHz,  $\text{CDCl}_3$ )  $\delta$  7.33 – 7.20 (m, 5H), 4.19 (dd,  $J = 9.1, 7.8$  Hz, 1H), 3.91 (dd,  $J = 9.9, 2.9$  Hz, 1H), 3.01 – 2.97 (m, 1H), 2.76 (qn,  $J = 7.2$  Hz, 1H), 2.39 (dd,  $J = 15.5, 3.0$  Hz, 1H), 2.28 (dd,  $J = 15.5, 10.0$  Hz, 1H), 1.31 (s, 3H), 1.30 (d,  $J = 6.9$  Hz, 3H), 0.60 (d,  $J = 7.1$  Hz, 3H);  $^{13}\text{C}$  NMR (100 MHz,  $\text{CDCl}_3$ )  $\delta$  176.2, 141.3, 128.7, 128.1, 127.2, 88.4, 85.7, 73.2, 46.2, 36.3, 35.3, 18.0, 16.9, 13.4; IR (thin film) 3417, 2967, 1714, 1454, 1282, 1072  $\text{cm}^{-1}$ ; HRMS (ESI)  $m/z$  calcd for  $\text{C}_{16}\text{H}_{22}\text{NaO}_4$  ( $\text{M} + \text{Na}$ ) $^+$  301.1416, found 301.1409.

## V. Stereochemical Proofs

### nOe Experiments:

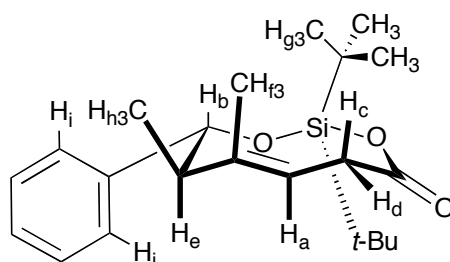

### Cyclononene **5**:

|                          |                      |                          |                      |                          |                      |                          |                     |
|--------------------------|----------------------|--------------------------|----------------------|--------------------------|----------------------|--------------------------|---------------------|
| $\text{H}_a$ irradiated: | $\text{H}_d$ (7.5%)  | $\text{H}_b$ irradiated: | $\text{H}_f$ (5.9%)  | $\text{H}_e$ irradiated: | $\text{H}_a$ (15.9%) | $\text{H}_f$ irradiated: | $\text{H}_b$ (2.6%) |
|                          | $\text{H}_e$ (17.6%) |                          | $\text{H}_g$ (7.3%)  |                          | $\text{H}_h$ (5.5%)  |                          | $\text{H}_c$ (3.7%) |
|                          |                      |                          | $\text{H}_h$ (2.9%)  |                          | $\text{H}_i$ (6.7%)  |                          | $\text{H}_h$ (2.6%) |
|                          |                      |                          | $\text{H}_i$ (14.3%) |                          |                      |                          |                     |

The stereochemistry of cyclononene **5** reveals that the addition of vinyl oxasilacyclopentene **3** to benzaldehyde occurred in a closed chair-like transition state. Lack of nOe correlation between  $\text{H}_a$  and  $\text{H}_f$  reveal that the alkene is *trans*.

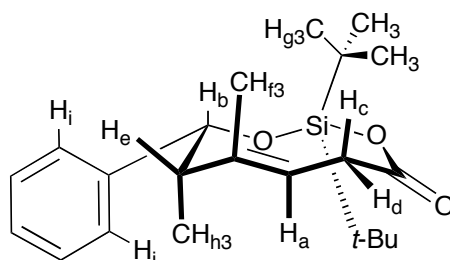

## Cyclononene 7:

|                   |                               |                   |                                                                |                   |                                                              |                   |                                              |
|-------------------|-------------------------------|-------------------|----------------------------------------------------------------|-------------------|--------------------------------------------------------------|-------------------|----------------------------------------------|
| $H_a$ irradiated: | $H_d$ (7.1%)<br>$H_h$ (10.1%) | $H_b$ irradiated: | $H_e$ (8.6%)<br>$H_f$ (7.6%)<br>$H_g$ (10.2%)<br>$H_i$ (12.1%) | $H_c$ irradiated: | $H_b$ (7.9%)<br>$H_f$ (6.8%)<br>$H_h$ (6.1%)<br>$H_i$ (6.7%) | $H_f$ irradiated: | $H_b$ (2.9%)<br>$H_c$ (3.8%)<br>$H_e$ (3.5%) |
|-------------------|-------------------------------|-------------------|----------------------------------------------------------------|-------------------|--------------------------------------------------------------|-------------------|----------------------------------------------|

The stereochemistry of cyclononene **7** reveals that the addition of vinyl oxasilacyclopentene from *trans*-dienoate **6** to benzaldehyde occurred in a closed chair-like transition state. Lack of nOe correlation between  $H_a$  and  $H_f$  reveal that the alkene is *trans*. Additionally lack of nOe correlation between  $H_f$  and  $H_h$  reveal that the two methyl groups are *trans* to one another as they were in the dienophile **6**.

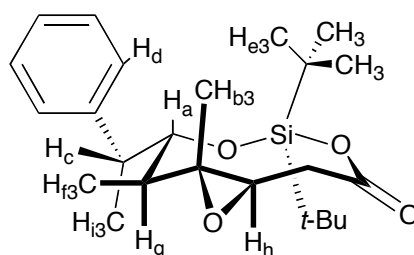Epoxide **23'**:

|                   |                                                                               |                   |                                                                 |                   |                                               |
|-------------------|-------------------------------------------------------------------------------|-------------------|-----------------------------------------------------------------|-------------------|-----------------------------------------------|
| $H_a$ irradiated: | $H_b$ (9.8%)<br>$H_c$ (9.0%)<br>$H_d$ (10.9%)<br>$H_e$ (9.5%)<br>$H_f$ (3.2%) | $H_f$ irradiated: | $H_a$ (5.4%)<br>$H_b$ (11.5%)<br>$H_c$ (16.7%)<br>$H_g$ (12.4%) | $H_g$ irradiated: | $H_f$ (6.3%)<br>$H_h$ (19.1%)<br>$H_i$ (7.7%) |
|-------------------|-------------------------------------------------------------------------------|-------------------|-----------------------------------------------------------------|-------------------|-----------------------------------------------|

The stereochemistry of epoxide **23'** indicates that the epoxidation occurred on the outside face of the alkene. Lack of nOe correlation between  $H_b$  and  $H_h$  indicate that they are *trans* to each other.

## VI. X-Ray Crystallography

A. Silacycle **10**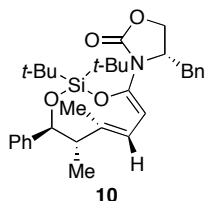

X-ray Data Collection, Structure Solution and Refinement for **10**.

A colorless crystal of approximate dimensions 0.17 x 0.32 x 0.33 mm was mounted on a glass fiber and transferred to a Bruker SMART APEX II diffractometer. The APEX2<sup>1</sup> program package was used to determine the unit-cell parameters and for data collection (25 sec/frame scan time for a sphere of diffraction data). The raw frame data was processed using SAINT<sup>2</sup> and SADABS<sup>3</sup> to yield the reflection data file. Subsequent calculations were carried out using the SHELXTL<sup>4</sup> program. There



were no systematic absences. The noncentrosymmetric triclinic space group *P1* was assigned and later determined to be correct.

The structure was solved by direct methods and refined on  $F^2$  by full-matrix least-squares techniques. The analytical scattering factors<sup>5</sup> for neutral atoms were used throughout the analysis. Hydrogen atoms were included using a riding model. There were two molecules of the formula-unit present ( $Z = 2$ ).

At convergence,  $wR2 = 0.1037$  and  $Goof = 1.032$  for 701 variables refined against 11858 data ( $0.80\text{\AA}$ ),  $R1 = 0.0391$  for those 11124 data with  $I > 2.0\sigma(I)$ . The absolute structure was assigned by refinement of the Flack parameter<sup>6</sup>

## References.

1. APEX2 Version 2.2-0 Bruker AXS, Inc.; Madison, WI 2007.
  2. SAINT Version 7.46a, Bruker AXS, Inc.; Madison, WI 2007.
  3. Sheldrick, G. M. SADABS, Version 2008/1, Bruker AXS, Inc.; Madison, WI 2008.
  4. Sheldrick, G. M. SHELXTL, Version 2008/4, Bruker AXS, Inc.; Madison, WI 2008.
  5. International Tables for X-Ray Crystallography 1992, Vol. C., Dordrecht: Kluwer Academic Publishers
  6. Flack, H. D. Acta. Cryst., A39, 876-881, 1983.
- 

## Definitions:

$$wR2 = [\Sigma[w(F_o^2 - F_c^2)^2] / \Sigma[w(F_o^2)^2]]^{1/2}$$

$$R1 = \Sigma||F_o| - |F_c|| / \Sigma|F_o|$$

Goof = S =  $[\Sigma[w(F_o^2 - F_c^2)^2] / (n-p)]^{1/2}$  where n is the number of reflections and p is the total number of parameters refined.

The thermal ellipsoid plot is shown at the 50% probability level.

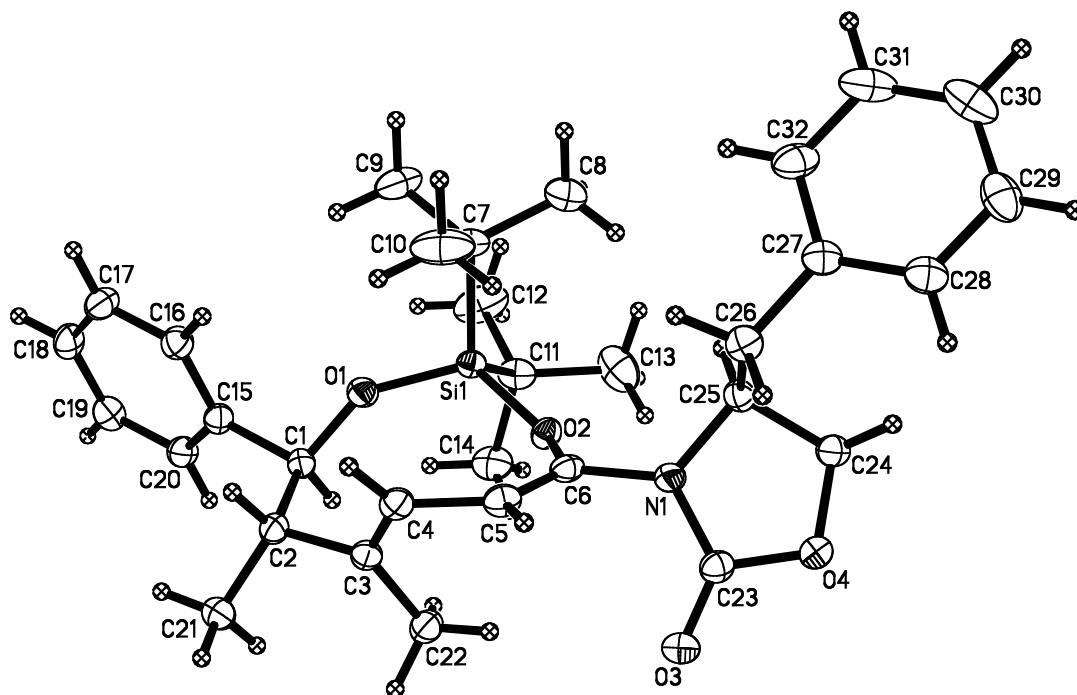

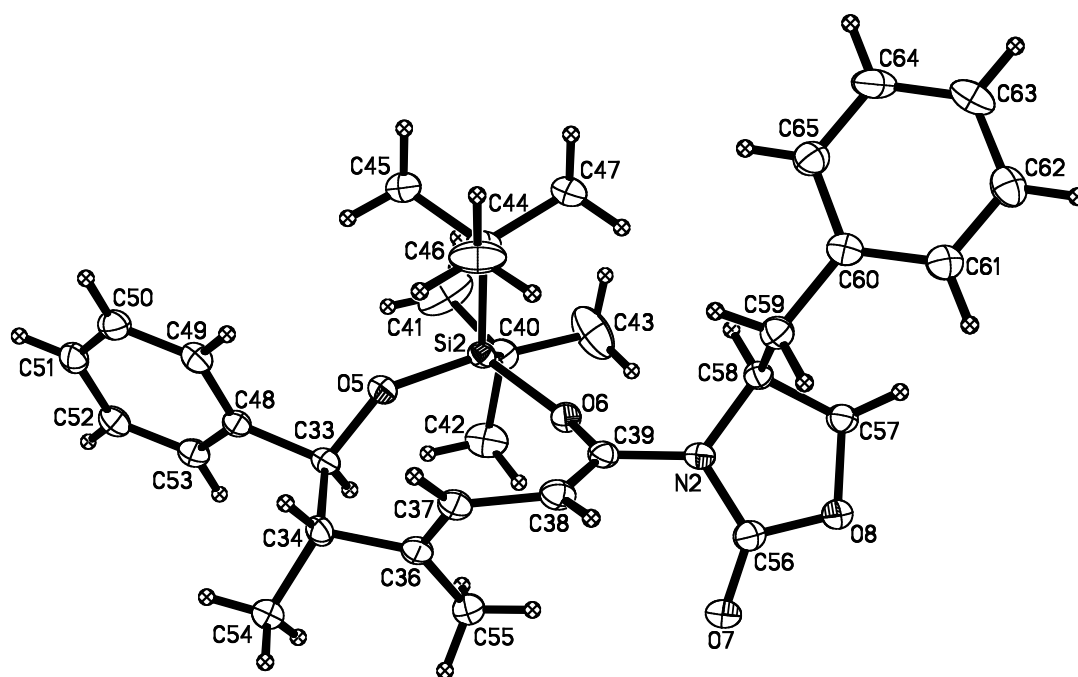Table 1. Crystal data and structure refinement for **10**.

|                        |                                                     |                   |
|------------------------|-----------------------------------------------------|-------------------|
| Identification code    | <b>10</b> (Christian Ventocilla)                    |                   |
| Empirical formula      | C <sub>32</sub> H <sub>43</sub> N O <sub>4</sub> Si |                   |
| Formula weight         | 533.76                                              |                   |
| Temperature            | 143(2) K                                            |                   |
| Wavelength             | 0.71073 Å                                           |                   |
| Crystal system         | Triclinic                                           |                   |
| Space group            | <i>P</i> 1                                          |                   |
| Unit cell dimensions   | a = 9.0489(9) Å                                     | ∠ = 96.5484(12)°. |
|                        | b = 11.8543(12) Å                                   | ∠ = 99.1573(12)°. |
|                        | c = 14.1652(14) Å                                   | ∠ = 90.8419(12)°. |
| Volume                 | 1489.5(3) Å <sup>3</sup>                            |                   |
| Z                      | 2                                                   |                   |
| Density (calculated)   | 1.190 Mg/m <sup>3</sup>                             |                   |
| Absorption coefficient | 0.115 mm <sup>-1</sup>                              |                   |
| F(000)                 | 576                                                 |                   |
| Crystal color          | colorless                                           |                   |

|                                          |                                                               |
|------------------------------------------|---------------------------------------------------------------|
| Crystal size                             | 0.33 x 0.32 x 0.17 mm <sup>3</sup>                            |
| Theta range for data collection          | 1.47 to 26.37°                                                |
| Index ranges                             | -11 ≤ <i>h</i> ≤ 11, -14 ≤ <i>k</i> ≤ 14, -17 ≤ <i>l</i> ≤ 17 |
| Reflections collected                    | 15959                                                         |
| Independent reflections                  | 11858 [R(int) = 0.0193]                                       |
| Completeness to theta = 25.50°           | 99.6 %                                                        |
| Absorption correction                    | Numerical                                                     |
| Max. and min. transmission               | 0.9803 and 0.9636                                             |
| Refinement method                        | Full-matrix least-squares on F <sup>2</sup>                   |
| Data / restraints / parameters           | 11858 / 3 / 701                                               |
| Goodness-of-fit on F <sup>2</sup>        | 1.032                                                         |
| Final R indices [I > 2σ(I) = 11124 data] | R1 = 0.0391, wR2 = 0.1009                                     |
| R indices (all data, 0.80 Å)             | R1 = 0.0424, wR2 = 0.1037                                     |
| Absolute structure parameter             | 0.05(7)                                                       |
| Largest diff. peak and hole              | 0.455 and -0.219 e.Å <sup>-3</sup>                            |

Table 2. Atomic coordinates ( $\times 10^4$ ) and equivalent isotropic displacement parameters ( $\text{\AA}^2 \times 10^3$ ) for **10**.  $U(\text{eq})$  is defined as one third of the trace of the orthogonalized  $U^{ij}$  tensor.

|       | x        | y        | z        | U(eq) |
|-------|----------|----------|----------|-------|
| Si(1) | 5602(1)  | 614(1)   | 9826(1)  | 17(1) |
| Si(2) | 13580(1) | -3633(1) | 15033(1) | 17(1) |
| O(1)  | 5816(2)  | 1983(1)  | 10083(1) | 21(1) |
| O(2)  | 6208(2)  | -165(1)  | 10713(1) | 19(1) |
| O(3)  | 7486(2)  | -1295(1) | 13121(1) | 30(1) |
| O(4)  | 7361(2)  | -3023(1) | 12267(1) | 23(1) |
| O(5)  | 13344(2) | -2339(1) | 14776(1) | 20(1) |
| O(6)  | 12987(2) | -4681(1) | 14152(1) | 20(1) |
| O(7)  | 11676(2) | -6503(1) | 11729(1) | 29(1) |
| O(8)  | 11813(2) | -7992(1) | 12586(1) | 22(1) |
| N(1)  | 7544(2)  | -1524(1) | 11480(1) | 21(1) |
| N(2)  | 11667(2) | -6282(2) | 13381(1) | 22(1) |
| C(1)  | 5372(2)  | 2918(2)  | 10693(1) | 20(1) |
| C(2)  | 6642(2)  | 3243(2)  | 11567(2) | 20(1) |
| C(3)  | 7113(2)  | 2153(2)  | 11971(1) | 20(1) |
| C(4)  | 8282(2)  | 1617(2)  | 11686(1) | 20(1) |
| C(5)  | 8518(2)  | 401(2)   | 11762(2) | 22(1) |
| C(6)  | 7489(2)  | -366(2)  | 11313(1) | 19(1) |
| C(15) | 5051(2)  | 3896(2)  | 10101(2) | 20(1) |
| C(16) | 5998(2)  | 4148(2)  | 9465(2)  | 24(1) |
| C(17) | 5743(3)  | 5053(2)  | 8934(2)  | 28(1) |
| C(18) | 4527(3)  | 5731(2)  | 9042(2)  | 27(1) |
| C(19) | 3565(2)  | 5491(2)  | 9664(2)  | 25(1) |
| C(20) | 3827(2)  | 4574(2)  | 10192(2) | 23(1) |
| C(21) | 6118(3)  | 4134(2)  | 12305(2) | 26(1) |
| C(22) | 6087(2)  | 1661(2)  | 12563(2) | 24(1) |
| C(11) | 3550(2)  | 143(2)   | 9547(2)  | 24(1) |
| C(14) | 2724(3)  | 685(2)   | 10346(2) | 31(1) |
| C(13) | 3360(3)  | -1158(2) | 9532(2)  | 41(1) |
| C(12) | 2796(3)  | 475(3)   | 8584(2)  | 45(1) |
| C(7)  | 6762(2)  | 325(2)   | 8827(2)  | 22(1) |

|       |          |          |          |       |
|-------|----------|----------|----------|-------|
| C(10) | 8416(3)  | 590(3)   | 9240(2)  | 43(1) |
| C(9)  | 6310(3)  | 1093(2)  | 8041(2)  | 36(1) |
| C(8)  | 6589(3)  | -909(2)  | 8364(2)  | 42(1) |
| C(23) | 7465(2)  | -1872(2) | 12360(2) | 21(1) |
| C(24) | 7127(2)  | -3448(2) | 11252(2) | 22(1) |
| C(25) | 7684(2)  | -2485(2) | 10754(2) | 20(1) |
| C(26) | 9317(2)  | -2592(2) | 10585(2) | 23(1) |
| C(27) | 9526(2)  | -3605(2) | 9877(2)  | 23(1) |
| C(28) | 9896(2)  | -4653(2) | 10195(2) | 26(1) |
| C(29) | 10006(3) | -5607(2) | 9549(2)  | 34(1) |
| C(30) | 9762(3)  | -5517(2) | 8569(2)  | 41(1) |
| C(31) | 9433(3)  | -4484(3) | 8244(2)  | 40(1) |
| C(32) | 9315(3)  | -3530(2) | 8888(2)  | 31(1) |
| C(33) | 13797(2) | -1570(2) | 14162(1) | 19(1) |
| C(34) | 12539(2) | -1519(2) | 13282(2) | 20(1) |
| C(36) | 12081(2) | -2735(2) | 12882(1) | 21(1) |
| C(37) | 10912(2) | -3221(2) | 13163(2) | 22(1) |
| C(38) | 10683(2) | -4464(2) | 13087(2) | 22(1) |
| C(39) | 11718(2) | -5084(2) | 13547(1) | 20(1) |
| C(48) | 14125(2) | -415(2)  | 14748(1) | 19(1) |
| C(49) | 13158(2) | 11(2)    | 15369(2) | 22(1) |
| C(50) | 13427(2) | 1072(2)  | 15887(2) | 26(1) |
| C(51) | 14665(3) | 1733(2)  | 15799(2) | 25(1) |
| C(52) | 15643(2) | 1317(2)  | 15184(2) | 24(1) |
| C(53) | 15368(2) | 246(2)   | 14666(2) | 22(1) |
| C(54) | 13074(3) | -815(2)  | 12548(2) | 26(1) |
| C(55) | 13119(2) | -3360(2) | 12291(2) | 25(1) |
| C(44) | 12415(2) | -3688(2) | 16028(2) | 22(1) |
| C(47) | 12597(3) | -4803(2) | 16487(2) | 32(1) |
| C(46) | 10759(3) | -3589(3) | 15603(2) | 38(1) |
| C(45) | 12836(3) | -2689(2) | 16822(2) | 30(1) |
| C(40) | 15641(2) | -3939(2) | 15312(2) | 24(1) |
| C(43) | 15894(3) | -5197(3) | 15451(3) | 52(1) |
| C(42) | 16424(3) | -3696(2) | 14470(2) | 34(1) |
| C(41) | 16398(3) | -3189(3) | 16215(2) | 51(1) |
| C(56) | 11714(2) | -6870(2) | 12491(2) | 22(1) |

|       |          |          |          |       |
|-------|----------|----------|----------|-------|
| C(57) | 12066(2) | -8138(2) | 13599(2) | 21(1) |
| C(58) | 11522(2) | -7044(2) | 14106(1) | 19(1) |
| C(59) | 9893(2)  | -7132(2) | 14282(2) | 22(1) |
| C(60) | 9667(2)  | -7968(2) | 14979(2) | 22(1) |
| C(61) | 9288(2)  | -9104(2) | 14650(2) | 24(1) |
| C(62) | 9151(2)  | -9891(2) | 15286(2) | 28(1) |
| C(63) | 9388(3)  | -9547(2) | 16268(2) | 32(1) |
| C(64) | 9730(3)  | -8415(2) | 16607(2) | 32(1) |
| C(65) | 9870(2)  | -7630(2) | 15970(2) | 26(1) |

---



Table 3. Bond lengths [Å] and angles [°] for **10**.

---

|             |            |
|-------------|------------|
| Si(1)-O(1)  | 1.6246(15) |
| Si(1)-O(2)  | 1.6719(14) |
| Si(1)-C(7)  | 1.896(2)   |
| Si(1)-C(11) | 1.898(2)   |
| Si(2)-O(5)  | 1.6260(15) |
| Si(2)-O(6)  | 1.6740(15) |
| Si(2)-C(40) | 1.894(2)   |
| Si(2)-C(44) | 1.896(2)   |
| O(1)-C(1)   | 1.428(2)   |
| O(2)-C(6)   | 1.365(2)   |
| O(3)-C(23)  | 1.207(3)   |
| O(4)-C(23)  | 1.356(2)   |
| O(4)-C(24)  | 1.449(2)   |
| O(5)-C(33)  | 1.428(2)   |
| O(6)-C(39)  | 1.363(2)   |
| O(7)-C(56)  | 1.205(3)   |
| O(8)-C(56)  | 1.355(3)   |
| O(8)-C(57)  | 1.447(2)   |
| N(1)-C(23)  | 1.368(3)   |
| N(1)-C(6)   | 1.419(3)   |
| N(1)-C(25)  | 1.466(2)   |
| N(2)-C(56)  | 1.376(3)   |
| N(2)-C(39)  | 1.412(3)   |
| N(2)-C(58)  | 1.463(2)   |
| C(1)-C(15)  | 1.512(3)   |
| C(1)-C(2)   | 1.558(3)   |
| C(2)-C(3)   | 1.512(3)   |
| C(2)-C(21)  | 1.534(3)   |
| C(3)-C(4)   | 1.335(3)   |
| C(3)-C(22)  | 1.500(3)   |
| C(4)-C(5)   | 1.474(3)   |
| C(5)-C(6)   | 1.324(3)   |
| C(15)-C(16) | 1.391(3)   |
| C(15)-C(20) | 1.393(3)   |

|             |          |
|-------------|----------|
| C(16)-C(17) | 1.380(3) |
| C(17)-C(18) | 1.390(3) |
| C(18)-C(19) | 1.382(3) |
| C(19)-C(20) | 1.391(3) |
| C(11)-C(12) | 1.521(3) |
| C(11)-C(14) | 1.540(3) |
| C(11)-C(13) | 1.547(3) |
| C(7)-C(9)   | 1.527(3) |
| C(7)-C(8)   | 1.528(3) |
| C(7)-C(10)  | 1.532(3) |
| C(24)-C(25) | 1.528(3) |
| C(25)-C(26) | 1.539(3) |
| C(26)-C(27) | 1.508(3) |
| C(27)-C(32) | 1.397(3) |
| C(27)-C(28) | 1.397(3) |
| C(28)-C(29) | 1.386(3) |
| C(29)-C(30) | 1.388(4) |
| C(30)-C(31) | 1.376(4) |
| C(31)-C(32) | 1.386(4) |
| C(33)-C(48) | 1.517(3) |
| C(33)-C(34) | 1.555(3) |
| C(34)-C(36) | 1.514(3) |
| C(34)-C(54) | 1.536(3) |
| C(36)-C(37) | 1.333(3) |
| C(36)-C(55) | 1.503(3) |
| C(37)-C(38) | 1.474(3) |
| C(38)-C(39) | 1.333(3) |
| C(48)-C(53) | 1.389(3) |
| C(48)-C(49) | 1.397(3) |
| C(49)-C(50) | 1.380(3) |
| C(50)-C(51) | 1.388(3) |
| C(51)-C(52) | 1.395(3) |
| C(52)-C(53) | 1.390(3) |
| C(44)-C(46) | 1.535(3) |
| C(44)-C(45) | 1.536(3) |
| C(44)-C(47) | 1.539(3) |

|             |          |
|-------------|----------|
| C(40)-C(41) | 1.529(3) |
| C(40)-C(42) | 1.533(3) |
| C(40)-C(43) | 1.542(3) |
| C(57)-C(58) | 1.535(3) |
| C(58)-C(59) | 1.538(3) |
| C(59)-C(60) | 1.510(3) |
| C(60)-C(61) | 1.393(3) |
| C(60)-C(65) | 1.397(3) |
| C(61)-C(62) | 1.386(3) |
| C(62)-C(63) | 1.386(4) |
| C(63)-C(64) | 1.386(4) |
| C(64)-C(65) | 1.386(3) |

|                   |            |
|-------------------|------------|
| O(1)-Si(1)-O(2)   | 116.47(7)  |
| O(1)-Si(1)-C(7)   | 101.86(9)  |
| O(2)-Si(1)-C(7)   | 109.46(8)  |
| O(1)-Si(1)-C(11)  | 111.87(9)  |
| O(2)-Si(1)-C(11)  | 100.46(9)  |
| C(7)-Si(1)-C(11)  | 117.44(10) |
| O(5)-Si(2)-O(6)   | 117.00(8)  |
| O(5)-Si(2)-C(40)  | 111.01(9)  |
| O(6)-Si(2)-C(40)  | 100.99(9)  |
| O(5)-Si(2)-C(44)  | 101.72(9)  |
| O(6)-Si(2)-C(44)  | 108.98(9)  |
| C(40)-Si(2)-C(44) | 117.91(10) |
| C(1)-O(1)-Si(1)   | 142.11(13) |
| C(6)-O(2)-Si(1)   | 140.41(13) |
| C(23)-O(4)-C(24)  | 108.86(15) |
| C(33)-O(5)-Si(2)  | 141.07(13) |
| C(39)-O(6)-Si(2)  | 140.59(13) |
| C(56)-O(8)-C(57)  | 109.16(15) |
| C(23)-N(1)-C(6)   | 122.91(17) |
| C(23)-N(1)-C(25)  | 111.80(16) |
| C(6)-N(1)-C(25)   | 125.29(16) |
| C(56)-N(2)-C(39)  | 122.85(17) |
| C(56)-N(2)-C(58)  | 111.96(17) |

|                   |            |
|-------------------|------------|
| C(39)-N(2)-C(58)  | 125.17(16) |
| O(1)-C(1)-C(15)   | 107.95(16) |
| O(1)-C(1)-C(2)    | 109.59(15) |
| C(15)-C(1)-C(2)   | 111.37(16) |
| C(3)-C(2)-C(21)   | 113.57(17) |
| C(3)-C(2)-C(1)    | 106.97(16) |
| C(21)-C(2)-C(1)   | 110.81(17) |
| C(4)-C(3)-C(22)   | 123.83(19) |
| C(4)-C(3)-C(2)    | 119.02(19) |
| C(22)-C(3)-C(2)   | 116.56(17) |
| C(3)-C(4)-C(5)    | 122.59(19) |
| C(6)-C(5)-C(4)    | 119.82(18) |
| C(5)-C(6)-O(2)    | 126.59(18) |
| C(5)-C(6)-N(1)    | 122.08(18) |
| O(2)-C(6)-N(1)    | 111.10(17) |
| C(16)-C(15)-C(20) | 118.66(19) |
| C(16)-C(15)-C(1)  | 120.27(18) |
| C(20)-C(15)-C(1)  | 121.06(18) |
| C(17)-C(16)-C(15) | 121.1(2)   |
| C(16)-C(17)-C(18) | 119.6(2)   |
| C(19)-C(18)-C(17) | 120.3(2)   |
| C(18)-C(19)-C(20) | 119.7(2)   |
| C(19)-C(20)-C(15) | 120.6(2)   |
| C(12)-C(11)-C(14) | 109.0(2)   |
| C(12)-C(11)-C(13) | 108.7(2)   |
| C(14)-C(11)-C(13) | 106.40(19) |
| C(12)-C(11)-Si(1) | 111.87(16) |
| C(14)-C(11)-Si(1) | 109.63(15) |
| C(13)-C(11)-Si(1) | 111.06(15) |
| C(9)-C(7)-C(8)    | 108.3(2)   |
| C(9)-C(7)-C(10)   | 107.7(2)   |
| C(8)-C(7)-C(10)   | 108.8(2)   |
| C(9)-C(7)-Si(1)   | 110.51(15) |
| C(8)-C(7)-Si(1)   | 112.30(16) |
| C(10)-C(7)-Si(1)  | 109.07(15) |
| O(3)-C(23)-O(4)   | 122.57(19) |

|                   |            |
|-------------------|------------|
| O(3)-C(23)-N(1)   | 128.3(2)   |
| O(4)-C(23)-N(1)   | 109.12(17) |
| O(4)-C(24)-C(25)  | 105.08(16) |
| N(1)-C(25)-C(24)  | 99.40(15)  |
| N(1)-C(25)-C(26)  | 110.85(16) |
| C(24)-C(25)-C(26) | 113.85(16) |
| C(27)-C(26)-C(25) | 112.68(17) |
| C(32)-C(27)-C(28) | 118.2(2)   |
| C(32)-C(27)-C(26) | 121.1(2)   |
| C(28)-C(27)-C(26) | 120.62(19) |
| C(29)-C(28)-C(27) | 121.3(2)   |
| C(28)-C(29)-C(30) | 119.4(2)   |
| C(31)-C(30)-C(29) | 120.1(2)   |
| C(30)-C(31)-C(32) | 120.6(2)   |
| C(31)-C(32)-C(27) | 120.4(2)   |
| O(5)-C(33)-C(48)  | 108.04(16) |
| O(5)-C(33)-C(34)  | 109.63(16) |
| C(48)-C(33)-C(34) | 111.64(16) |
| C(36)-C(34)-C(54) | 113.86(17) |
| C(36)-C(34)-C(33) | 106.85(16) |
| C(54)-C(34)-C(33) | 110.64(17) |
| C(37)-C(36)-C(55) | 124.16(19) |
| C(37)-C(36)-C(34) | 118.91(19) |
| C(55)-C(36)-C(34) | 116.42(18) |
| C(36)-C(37)-C(38) | 122.47(19) |
| C(39)-C(38)-C(37) | 119.70(19) |
| C(38)-C(39)-O(6)  | 126.42(19) |
| C(38)-C(39)-N(2)  | 121.80(18) |
| O(6)-C(39)-N(2)   | 111.57(17) |
| C(53)-C(48)-C(49) | 118.77(19) |
| C(53)-C(48)-C(33) | 120.96(18) |
| C(49)-C(48)-C(33) | 120.25(18) |
| C(50)-C(49)-C(48) | 120.67(19) |
| C(49)-C(50)-C(51) | 120.4(2)   |
| C(50)-C(51)-C(52) | 119.6(2)   |
| C(53)-C(52)-C(51) | 119.66(19) |

|                   |            |
|-------------------|------------|
| C(48)-C(53)-C(52) | 120.89(19) |
| C(46)-C(44)-C(45) | 107.59(19) |
| C(46)-C(44)-C(47) | 108.54(19) |
| C(45)-C(44)-C(47) | 108.59(18) |
| C(46)-C(44)-Si(2) | 108.80(15) |
| C(45)-C(44)-Si(2) | 111.10(15) |
| C(47)-C(44)-Si(2) | 112.08(15) |
| C(41)-C(40)-C(42) | 108.2(2)   |
| C(41)-C(40)-C(43) | 109.2(2)   |
| C(42)-C(40)-C(43) | 106.6(2)   |
| C(41)-C(40)-Si(2) | 110.84(16) |
| C(42)-C(40)-Si(2) | 109.89(15) |
| C(43)-C(40)-Si(2) | 111.93(16) |
| O(7)-C(56)-O(8)   | 122.75(19) |
| O(7)-C(56)-N(2)   | 128.5(2)   |
| O(8)-C(56)-N(2)   | 108.74(17) |
| O(8)-C(57)-C(58)  | 105.04(16) |
| N(2)-C(58)-C(57)  | 99.10(15)  |
| N(2)-C(58)-C(59)  | 111.01(16) |
| C(57)-C(58)-C(59) | 113.92(16) |
| C(60)-C(59)-C(58) | 113.00(17) |
| C(61)-C(60)-C(65) | 118.4(2)   |
| C(61)-C(60)-C(59) | 120.67(19) |
| C(65)-C(60)-C(59) | 120.95(19) |
| C(62)-C(61)-C(60) | 121.2(2)   |
| C(63)-C(62)-C(61) | 119.7(2)   |
| C(64)-C(63)-C(62) | 119.9(2)   |
| C(63)-C(64)-C(65) | 120.3(2)   |
| C(64)-C(65)-C(60) | 120.5(2)   |

---

Table 4. Anisotropic displacement parameters ( $\text{\AA}^2 \times 10^3$ ) for **10**. The anisotropic displacement factor exponent takes the form:  $-2\pi^2 [ h^2 a^{*2} U^{11} + \dots + 2 h k a^* b^* U^{12} ]$

|       | U <sup>11</sup> | U <sup>22</sup> | U <sup>33</sup> | U <sup>23</sup> | U <sup>13</sup> | U <sup>12</sup> |
|-------|-----------------|-----------------|-----------------|-----------------|-----------------|-----------------|
| Si(1) | 15(1)           | 19(1)           | 15(1)           | 2(1)            | 0(1)            | 2(1)            |
| Si(2) | 16(1)           | 19(1)           | 15(1)           | 4(1)            | 0(1)            | 0(1)            |
| O(1)  | 24(1)           | 20(1)           | 18(1)           | 2(1)            | 2(1)            | 3(1)            |
| O(2)  | 19(1)           | 20(1)           | 19(1)           | 5(1)            | 0(1)            | 0(1)            |
| O(3)  | 43(1)           | 27(1)           | 19(1)           | 2(1)            | 8(1)            | 3(1)            |
| O(4)  | 26(1)           | 22(1)           | 20(1)           | 4(1)            | 4(1)            | 1(1)            |
| O(5)  | 23(1)           | 20(1)           | 19(1)           | 5(1)            | 3(1)            | 1(1)            |
| O(6)  | 20(1)           | 21(1)           | 19(1)           | 3(1)            | -1(1)           | 1(1)            |
| O(7)  | 41(1)           | 29(1)           | 19(1)           | 5(1)            | 7(1)            | -1(1)           |
| O(8)  | 26(1)           | 22(1)           | 20(1)           | 2(1)            | 5(1)            | 1(1)            |
| N(1)  | 28(1)           | 19(1)           | 15(1)           | 3(1)            | 3(1)            | 4(1)            |
| N(2)  | 28(1)           | 22(1)           | 15(1)           | 3(1)            | 4(1)            | -1(1)           |
| C(1)  | 22(1)           | 17(1)           | 19(1)           | 2(1)            | 3(1)            | 0(1)            |
| C(2)  | 24(1)           | 18(1)           | 19(1)           | 4(1)            | 2(1)            | -1(1)           |
| C(3)  | 22(1)           | 21(1)           | 16(1)           | 2(1)            | -1(1)           | -2(1)           |
| C(4)  | 19(1)           | 24(1)           | 17(1)           | 3(1)            | -2(1)           | -3(1)           |
| C(5)  | 18(1)           | 28(1)           | 18(1)           | 5(1)            | 1(1)            | 3(1)            |
| C(6)  | 21(1)           | 23(1)           | 15(1)           | 5(1)            | 4(1)            | 7(1)            |
| C(15) | 22(1)           | 20(1)           | 18(1)           | 4(1)            | -2(1)           | 0(1)            |
| C(16) | 24(1)           | 23(1)           | 26(1)           | 3(1)            | 6(1)            | 1(1)            |
| C(17) | 34(1)           | 30(1)           | 23(1)           | 7(1)            | 6(1)            | -3(1)           |
| C(18) | 33(1)           | 23(1)           | 24(1)           | 8(1)            | -4(1)           | 0(1)            |
| C(19) | 24(1)           | 24(1)           | 26(1)           | 2(1)            | -2(1)           | 5(1)            |
| C(20) | 23(1)           | 23(1)           | 22(1)           | 4(1)            | 4(1)            | 2(1)            |
| C(21) | 33(1)           | 23(1)           | 22(1)           | 1(1)            | 3(1)            | 1(1)            |
| C(22) | 28(1)           | 24(1)           | 24(1)           | 6(1)            | 6(1)            | 2(1)            |
| C(11) | 15(1)           | 34(1)           | 21(1)           | 1(1)            | 0(1)            | -1(1)           |
| C(14) | 20(1)           | 42(1)           | 31(1)           | 1(1)            | 8(1)            | -5(1)           |
| C(13) | 27(1)           | 37(1)           | 54(2)           | -9(1)           | 6(1)            | -8(1)           |
| C(12) | 25(1)           | 80(2)           | 30(1)           | 16(1)           | -5(1)           | -2(1)           |
| C(7)  | 19(1)           | 30(1)           | 16(1)           | 2(1)            | 4(1)            | 3(1)            |

|       |       |       |       |        |       |       |
|-------|-------|-------|-------|--------|-------|-------|
| C(10) | 21(1) | 81(2) | 27(1) | 0(1)   | 7(1)  | -1(1) |
| C(9)  | 36(1) | 50(2) | 26(1) | 16(1)  | 13(1) | 14(1) |
| C(8)  | 57(2) | 36(1) | 36(1) | -1(1)  | 25(1) | 3(1)  |
| C(23) | 20(1) | 24(1) | 20(1) | 4(1)   | 3(1)  | 3(1)  |
| C(24) | 23(1) | 23(1) | 20(1) | 2(1)   | 5(1)  | 1(1)  |
| C(25) | 21(1) | 19(1) | 18(1) | 1(1)   | 1(1)  | 2(1)  |
| C(26) | 22(1) | 25(1) | 23(1) | 2(1)   | 2(1)  | -1(1) |
| C(27) | 17(1) | 29(1) | 22(1) | 2(1)   | 4(1)  | 2(1)  |
| C(28) | 20(1) | 32(1) | 25(1) | 2(1)   | 5(1)  | 3(1)  |
| C(29) | 26(1) | 29(1) | 47(2) | -1(1)  | 9(1)  | 4(1)  |
| C(30) | 33(1) | 45(2) | 41(2) | -14(1) | 10(1) | 6(1)  |
| C(31) | 34(1) | 62(2) | 23(1) | -2(1)  | 8(1)  | 11(1) |
| C(32) | 27(1) | 44(1) | 26(1) | 10(1)  | 10(1) | 11(1) |
| C(33) | 21(1) | 20(1) | 18(1) | 6(1)   | 4(1)  | 1(1)  |
| C(34) | 23(1) | 18(1) | 20(1) | 5(1)   | 0(1)  | 3(1)  |
| C(36) | 23(1) | 22(1) | 16(1) | 5(1)   | -2(1) | 3(1)  |
| C(37) | 22(1) | 25(1) | 18(1) | 6(1)   | -3(1) | 4(1)  |
| C(38) | 21(1) | 28(1) | 18(1) | 4(1)   | 0(1)  | -2(1) |
| C(39) | 21(1) | 22(1) | 16(1) | 3(1)   | 3(1)  | -5(1) |
| C(48) | 22(1) | 20(1) | 16(1) | 5(1)   | -1(1) | 4(1)  |
| C(49) | 20(1) | 24(1) | 24(1) | 8(1)   | 5(1)  | 3(1)  |
| C(50) | 28(1) | 28(1) | 22(1) | 6(1)   | 6(1)  | 9(1)  |
| C(51) | 32(1) | 21(1) | 20(1) | 4(1)   | -4(1) | 2(1)  |
| C(52) | 20(1) | 26(1) | 25(1) | 8(1)   | 2(1)  | -2(1) |
| C(53) | 18(1) | 26(1) | 21(1) | 6(1)   | 2(1)  | 1(1)  |
| C(54) | 34(1) | 24(1) | 21(1) | 5(1)   | 5(1)  | 3(1)  |
| C(55) | 28(1) | 24(1) | 23(1) | 2(1)   | 6(1)  | 0(1)  |
| C(44) | 24(1) | 29(1) | 15(1) | 4(1)   | 4(1)  | -2(1) |
| C(47) | 45(1) | 30(1) | 25(1) | 6(1)   | 12(1) | -3(1) |
| C(46) | 21(1) | 70(2) | 24(1) | 10(1)  | 6(1)  | 3(1)  |
| C(45) | 40(1) | 29(1) | 22(1) | 2(1)   | 10(1) | -2(1) |
| C(40) | 19(1) | 26(1) | 24(1) | 5(1)   | -1(1) | 2(1)  |
| C(43) | 32(1) | 46(2) | 84(2) | 35(2)  | 9(1)  | 14(1) |
| C(42) | 20(1) | 50(2) | 34(1) | 11(1)  | 7(1)  | 11(1) |
| C(41) | 22(1) | 84(2) | 37(2) | -19(2) | -6(1) | 5(1)  |
| C(56) | 20(1) | 25(1) | 20(1) | 1(1)   | 4(1)  | -3(1) |



|       |       |       |       |       |       |       |
|-------|-------|-------|-------|-------|-------|-------|
| C(57) | 23(1) | 23(1) | 19(1) | 4(1)  | 3(1)  | 1(1)  |
| C(58) | 22(1) | 19(1) | 16(1) | 3(1)  | 0(1)  | -2(1) |
| C(59) | 22(1) | 23(1) | 21(1) | 3(1)  | 2(1)  | 3(1)  |
| C(60) | 18(1) | 27(1) | 22(1) | 5(1)  | 4(1)  | 3(1)  |
| C(61) | 19(1) | 29(1) | 24(1) | 3(1)  | 4(1)  | -1(1) |
| C(62) | 20(1) | 28(1) | 37(1) | 6(1)  | 8(1)  | -1(1) |
| C(63) | 27(1) | 41(1) | 32(1) | 17(1) | 10(1) | 0(1)  |
| C(64) | 32(1) | 46(1) | 20(1) | 6(1)  | 7(1)  | -5(1) |
| C(65) | 24(1) | 29(1) | 25(1) | 1(1)  | 6(1)  | -4(1) |

---

Table 5. Hydrogen coordinates ( $\times 10^4$ ) and isotropic displacement parameters ( $\text{\AA}^2 \times 10^{-3}$ ) for **10**.

|        | x    | y     | z     | U(eq) |
|--------|------|-------|-------|-------|
| H(1A)  | 4441 | 2694  | 10932 | 23    |
| H(2A)  | 7514 | 3575  | 11327 | 25    |
| H(4A)  | 8989 | 2035  | 11424 | 25    |
| H(5A)  | 9405 | 168   | 12133 | 26    |
| H(16A) | 6835 | 3689  | 9394  | 29    |
| H(17A) | 6394 | 5211  | 8498  | 34    |
| H(18A) | 4356 | 6363  | 8686  | 33    |
| H(19A) | 2727 | 5951  | 9730  | 30    |
| H(20A) | 3164 | 4409  | 10619 | 27    |
| H(21A) | 6924 | 4313  | 12854 | 39    |
| H(21B) | 5236 | 3833  | 12526 | 39    |
| H(21C) | 5860 | 4825  | 12004 | 39    |
| H(22A) | 6412 | 902   | 12698 | 37    |
| H(22B) | 5062 | 1605  | 12208 | 37    |
| H(22C) | 6118 | 2153  | 13171 | 37    |
| H(14A) | 1710 | 346   | 10259 | 46    |
| H(14B) | 2665 | 1505  | 10313 | 46    |
| H(14C) | 3271 | 550   | 10976 | 46    |
| H(13A) | 2292 | -1373 | 9429  | 61    |
| H(13B) | 3845 | -1383 | 10149 | 61    |
| H(13C) | 3825 | -1543 | 9010  | 61    |
| H(12A) | 1728 | 261   | 8484  | 68    |
| H(12B) | 3259 | 79    | 8065  | 68    |
| H(12C) | 2917 | 1297  | 8582  | 68    |
| H(10A) | 9018 | 468   | 8723  | 65    |
| H(10B) | 8746 | 89    | 9732  | 65    |
| H(10C) | 8542 | 1384  | 9531  | 65    |
| H(9A)  | 6950 | 957   | 7545  | 53    |
| H(9B)  | 6429 | 1889  | 8323  | 53    |
| H(9C)  | 5262 | 925   | 7750  | 53    |

|        |       |       |       |    |
|--------|-------|-------|-------|----|
| H(8A)  | 7250  | -1030 | 7879  | 62 |
| H(8B)  | 5548  | -1072 | 8056  | 62 |
| H(8C)  | 6860  | -1416 | 8860  | 62 |
| H(24A) | 6052  | -3631 | 11012 | 26 |
| H(24B) | 7703  | -4140 | 11137 | 26 |
| H(25A) | 7002  | -2407 | 10137 | 24 |
| H(26A) | 9637  | -1892 | 10342 | 28 |
| H(26B) | 9967  | -2658 | 11207 | 28 |
| H(28A) | 10075 | -4714 | 10866 | 31 |
| H(29A) | 10246 | -6317 | 9776  | 41 |
| H(30A) | 9822  | -6169 | 8121  | 49 |
| H(31A) | 9286  | -4424 | 7573  | 48 |
| H(32A) | 9090  | -2821 | 8655  | 38 |
| H(33A) | 14730 | -1844 | 13928 | 23 |
| H(34A) | 11660 | -1144 | 13515 | 24 |
| H(37A) | 10201 | -2748 | 13422 | 26 |
| H(38A) | 9801  | -4821 | 12711 | 27 |
| H(49A) | 12306 | -434  | 15435 | 26 |
| H(50A) | 12760 | 1352  | 16307 | 31 |
| H(51A) | 14845 | 2464  | 16155 | 30 |
| H(52A) | 16494 | 1763  | 15120 | 28 |
| H(53A) | 16039 | -38   | 14251 | 26 |
| H(54A) | 12279 | -813  | 11991 | 39 |
| H(54B) | 13969 | -1149 | 12338 | 39 |
| H(54C) | 13315 | -34   | 12848 | 39 |
| H(55A) | 12805 | -4165 | 12159 | 37 |
| H(55B) | 14143 | -3286 | 12647 | 37 |
| H(55C) | 13084 | -3035 | 11682 | 37 |
| H(47A) | 11912 | -4826 | 16956 | 48 |
| H(47B) | 13631 | -4845 | 16813 | 48 |
| H(47C) | 12364 | -5449 | 15985 | 48 |
| H(46A) | 10148 | -3599 | 16115 | 57 |
| H(46B) | 10448 | -4230 | 15106 | 57 |
| H(46C) | 10622 | -2875 | 15318 | 57 |
| H(45A) | 12206 | -2729 | 17321 | 45 |
| H(45B) | 12679 | -1971 | 16545 | 45 |

|        |       |        |       |    |
|--------|-------|--------|-------|----|
| H(45C) | 13891 | -2729  | 17108 | 45 |
| H(43A) | 16970 | -5336  | 15538 | 77 |
| H(43B) | 15385 | -5682  | 14881 | 77 |
| H(43C) | 15489 | -5374  | 16020 | 77 |
| H(42A) | 17460 | -3941  | 14584 | 51 |
| H(42B) | 16420 | -2879  | 14415 | 51 |
| H(42C) | 15893 | -4111  | 13872 | 51 |
| H(41A) | 17477 | -3314  | 16315 | 76 |
| H(41B) | 15978 | -3385  | 16774 | 76 |
| H(41C) | 16223 | -2390  | 16135 | 76 |
| H(57A) | 13142 | -8236  | 13831 | 26 |
| H(57B) | 11490 | -8810  | 13718 | 26 |
| H(58A) | 12212 | -6789  | 14721 | 23 |
| H(59A) | 9589  | -6373  | 14537 | 27 |
| H(59B) | 9234  | -7365  | 13660 | 27 |
| H(61A) | 9121  | -9343  | 13977 | 29 |
| H(62A) | 8896  | -10663 | 15050 | 33 |
| H(63A) | 9316  | -10086 | 16707 | 38 |
| H(64A) | 9868  | -8176  | 17279 | 39 |
| H(65A) | 10106 | -6856  | 16209 | 31 |

---

Table 6. Torsion angles [°] for **10**.

---

|                        |             |
|------------------------|-------------|
| O(2)-Si(1)-O(1)-C(1)   | -62.5(2)    |
| C(7)-Si(1)-O(1)-C(1)   | 178.5(2)    |
| C(11)-Si(1)-O(1)-C(1)  | 52.2(2)     |
| O(1)-Si(1)-O(2)-C(6)   | -59.5(2)    |
| C(7)-Si(1)-O(2)-C(6)   | 55.3(2)     |
| C(11)-Si(1)-O(2)-C(6)  | 179.5(2)    |
| O(6)-Si(2)-O(5)-C(33)  | -63.1(2)    |
| C(40)-Si(2)-O(5)-C(33) | 52.0(2)     |
| C(44)-Si(2)-O(5)-C(33) | 178.3(2)    |
| O(5)-Si(2)-O(6)-C(39)  | -58.2(2)    |
| C(40)-Si(2)-O(6)-C(39) | -178.8(2)   |
| C(44)-Si(2)-O(6)-C(39) | 56.4(2)     |
| Si(1)-O(1)-C(1)-C(15)  | -138.61(18) |
| Si(1)-O(1)-C(1)-C(2)   | 99.9(2)     |
| O(1)-C(1)-C(2)-C(3)    | -48.1(2)    |
| C(15)-C(1)-C(2)-C(3)   | -167.43(16) |
| O(1)-C(1)-C(2)-C(21)   | -172.33(16) |
| C(15)-C(1)-C(2)-C(21)  | 68.3(2)     |
| C(21)-C(2)-C(3)-C(4)   | -142.4(2)   |
| C(1)-C(2)-C(3)-C(4)    | 95.1(2)     |
| C(21)-C(2)-C(3)-C(22)  | 46.1(2)     |
| C(1)-C(2)-C(3)-C(22)   | -76.5(2)    |
| C(22)-C(3)-C(4)-C(5)   | 12.2(3)     |
| C(2)-C(3)-C(4)-C(5)    | -158.71(19) |
| C(3)-C(4)-C(5)-C(6)    | 59.4(3)     |
| C(4)-C(5)-C(6)-O(2)    | 4.1(3)      |
| C(4)-C(5)-C(6)-N(1)    | -169.99(18) |
| Si(1)-O(2)-C(6)-C(5)   | 41.7(3)     |
| Si(1)-O(2)-C(6)-N(1)   | -143.70(17) |
| C(23)-N(1)-C(6)-C(5)   | 62.0(3)     |
| C(25)-N(1)-C(6)-C(5)   | -118.2(2)   |
| C(23)-N(1)-C(6)-O(2)   | -112.9(2)   |
| C(25)-N(1)-C(6)-O(2)   | 66.9(2)     |
| O(1)-C(1)-C(15)-C(16)  | -42.5(2)    |

|                         |             |
|-------------------------|-------------|
| C(2)-C(1)-C(15)-C(16)   | 77.9(2)     |
| O(1)-C(1)-C(15)-C(20)   | 138.79(19)  |
| C(2)-C(1)-C(15)-C(20)   | -100.9(2)   |
| C(20)-C(15)-C(16)-C(17) | 0.3(3)      |
| C(1)-C(15)-C(16)-C(17)  | -178.53(19) |
| C(15)-C(16)-C(17)-C(18) | 0.5(3)      |
| C(16)-C(17)-C(18)-C(19) | -1.0(3)     |
| C(17)-C(18)-C(19)-C(20) | 0.7(3)      |
| C(18)-C(19)-C(20)-C(15) | 0.1(3)      |
| C(16)-C(15)-C(20)-C(19) | -0.6(3)     |
| C(1)-C(15)-C(20)-C(19)  | 178.22(19)  |
| O(1)-Si(1)-C(11)-C(12)  | 71.2(2)     |
| O(2)-Si(1)-C(11)-C(12)  | -164.53(18) |
| C(7)-Si(1)-C(11)-C(12)  | -46.0(2)    |
| O(1)-Si(1)-C(11)-C(14)  | -49.81(18)  |
| O(2)-Si(1)-C(11)-C(14)  | 74.42(17)   |
| C(7)-Si(1)-C(11)-C(14)  | -167.05(15) |
| O(1)-Si(1)-C(11)-C(13)  | -167.11(16) |
| O(2)-Si(1)-C(11)-C(13)  | -42.88(18)  |
| C(7)-Si(1)-C(11)-C(13)  | 75.65(19)   |
| O(1)-Si(1)-C(7)-C(9)    | -51.83(18)  |
| O(2)-Si(1)-C(7)-C(9)    | -175.69(15) |
| C(11)-Si(1)-C(7)-C(9)   | 70.71(19)   |
| O(1)-Si(1)-C(7)-C(8)    | -172.88(17) |
| O(2)-Si(1)-C(7)-C(8)    | 63.26(19)   |
| C(11)-Si(1)-C(7)-C(8)   | -50.3(2)    |
| O(1)-Si(1)-C(7)-C(10)   | 66.45(19)   |
| O(2)-Si(1)-C(7)-C(10)   | -57.4(2)    |
| C(11)-Si(1)-C(7)-C(10)  | -171.02(18) |
| C(24)-O(4)-C(23)-O(3)   | 171.08(19)  |
| C(24)-O(4)-C(23)-N(1)   | -9.2(2)     |
| C(6)-N(1)-C(23)-O(3)    | -7.7(3)     |
| C(25)-N(1)-C(23)-O(3)   | 172.5(2)    |
| C(6)-N(1)-C(23)-O(4)    | 172.58(17)  |
| C(25)-N(1)-C(23)-O(4)   | -7.2(2)     |
| C(23)-O(4)-C(24)-C(25)  | 21.0(2)     |

|                         |             |
|-------------------------|-------------|
| C(23)-N(1)-C(25)-C(24)  | 19.0(2)     |
| C(6)-N(1)-C(25)-C(24)   | -160.83(18) |
| C(23)-N(1)-C(25)-C(26)  | -101.2(2)   |
| C(6)-N(1)-C(25)-C(26)   | 79.1(2)     |
| O(4)-C(24)-C(25)-N(1)   | -23.05(18)  |
| O(4)-C(24)-C(25)-C(26)  | 94.83(19)   |
| N(1)-C(25)-C(26)-C(27)  | 177.24(17)  |
| C(24)-C(25)-C(26)-C(27) | 66.2(2)     |
| C(25)-C(26)-C(27)-C(32) | 87.1(2)     |
| C(25)-C(26)-C(27)-C(28) | -91.0(2)    |
| C(32)-C(27)-C(28)-C(29) | -2.0(3)     |
| C(26)-C(27)-C(28)-C(29) | 176.2(2)    |
| C(27)-C(28)-C(29)-C(30) | 0.8(3)      |
| C(28)-C(29)-C(30)-C(31) | 0.8(4)      |
| C(29)-C(30)-C(31)-C(32) | -1.2(4)     |
| C(30)-C(31)-C(32)-C(27) | -0.1(4)     |
| C(28)-C(27)-C(32)-C(31) | 1.7(3)      |
| C(26)-C(27)-C(32)-C(31) | -176.5(2)   |
| Si(2)-O(5)-C(33)-C(48)  | -137.94(17) |
| Si(2)-O(5)-C(33)-C(34)  | 100.2(2)    |
| O(5)-C(33)-C(34)-C(36)  | -48.5(2)    |
| C(48)-C(33)-C(34)-C(36) | -168.18(16) |
| O(5)-C(33)-C(34)-C(54)  | -172.95(16) |
| C(48)-C(33)-C(34)-C(54) | 67.4(2)     |
| C(54)-C(34)-C(36)-C(37) | -142.5(2)   |
| C(33)-C(34)-C(36)-C(37) | 95.0(2)     |
| C(54)-C(34)-C(36)-C(55) | 45.4(2)     |
| C(33)-C(34)-C(36)-C(55) | -77.0(2)    |
| C(55)-C(36)-C(37)-C(38) | 12.4(3)     |
| C(34)-C(36)-C(37)-C(38) | -159.06(19) |
| C(36)-C(37)-C(38)-C(39) | 59.6(3)     |
| C(37)-C(38)-C(39)-O(6)  | 4.1(3)      |
| C(37)-C(38)-C(39)-N(2)  | -170.06(18) |
| Si(2)-O(6)-C(39)-C(38)  | 41.0(3)     |
| Si(2)-O(6)-C(39)-N(2)   | -144.41(17) |
| C(56)-N(2)-C(39)-C(38)  | 60.0(3)     |

|                         |             |
|-------------------------|-------------|
| C(58)-N(2)-C(39)-C(38)  | -118.4(2)   |
| C(56)-N(2)-C(39)-O(6)   | -114.9(2)   |
| C(58)-N(2)-C(39)-O(6)   | 66.7(2)     |
| O(5)-C(33)-C(48)-C(53)  | 137.55(18)  |
| C(34)-C(33)-C(48)-C(53) | -101.8(2)   |
| O(5)-C(33)-C(48)-C(49)  | -43.7(2)    |
| C(34)-C(33)-C(48)-C(49) | 76.9(2)     |
| C(53)-C(48)-C(49)-C(50) | 0.4(3)      |
| C(33)-C(48)-C(49)-C(50) | -178.39(18) |
| C(48)-C(49)-C(50)-C(51) | 0.0(3)      |
| C(49)-C(50)-C(51)-C(52) | -0.3(3)     |
| C(50)-C(51)-C(52)-C(53) | 0.1(3)      |
| C(49)-C(48)-C(53)-C(52) | -0.6(3)     |
| C(33)-C(48)-C(53)-C(52) | 178.17(18)  |
| C(51)-C(52)-C(53)-C(48) | 0.4(3)      |
| O(5)-Si(2)-C(44)-C(46)  | 66.62(18)   |
| O(6)-Si(2)-C(44)-C(46)  | -57.55(18)  |
| C(40)-Si(2)-C(44)-C(46) | -171.77(16) |
| O(5)-Si(2)-C(44)-C(45)  | -51.65(16)  |
| O(6)-Si(2)-C(44)-C(45)  | -175.82(14) |
| C(40)-Si(2)-C(44)-C(45) | 69.96(18)   |
| O(5)-Si(2)-C(44)-C(47)  | -173.34(15) |
| O(6)-Si(2)-C(44)-C(47)  | 62.49(17)   |
| C(40)-Si(2)-C(44)-C(47) | -51.73(19)  |
| O(5)-Si(2)-C(40)-C(41)  | 64.0(2)     |
| O(6)-Si(2)-C(40)-C(41)  | -171.30(19) |
| C(44)-Si(2)-C(40)-C(41) | -52.8(2)    |
| O(5)-Si(2)-C(40)-C(42)  | -55.59(18)  |
| O(6)-Si(2)-C(40)-C(42)  | 69.16(17)   |
| C(44)-Si(2)-C(40)-C(42) | -172.30(15) |
| O(5)-Si(2)-C(40)-C(43)  | -173.85(19) |
| O(6)-Si(2)-C(40)-C(43)  | -49.1(2)    |
| C(44)-Si(2)-C(40)-C(43) | 69.4(2)     |
| C(57)-O(8)-C(56)-O(7)   | 171.29(19)  |
| C(57)-O(8)-C(56)-N(2)   | -8.8(2)     |
| C(39)-N(2)-C(56)-O(7)   | -6.8(3)     |



|                         |             |
|-------------------------|-------------|
| C(58)-N(2)-C(56)-O(7)   | 171.8(2)    |
| C(39)-N(2)-C(56)-O(8)   | 173.29(17)  |
| C(58)-N(2)-C(56)-O(8)   | -8.1(2)     |
| C(56)-O(8)-C(57)-C(58)  | 21.1(2)     |
| C(56)-N(2)-C(58)-C(57)  | 19.8(2)     |
| C(39)-N(2)-C(58)-C(57)  | -161.68(18) |
| C(56)-N(2)-C(58)-C(59)  | -100.3(2)   |
| C(39)-N(2)-C(58)-C(59)  | 78.2(2)     |
| O(8)-C(57)-C(58)-N(2)   | -23.55(18)  |
| O(8)-C(57)-C(58)-C(59)  | 94.38(19)   |
| N(2)-C(58)-C(59)-C(60)  | 176.31(17)  |
| C(57)-C(58)-C(59)-C(60) | 65.5(2)     |
| C(58)-C(59)-C(60)-C(61) | -90.3(2)    |
| C(58)-C(59)-C(60)-C(65) | 88.0(2)     |
| C(65)-C(60)-C(61)-C(62) | -1.6(3)     |
| C(59)-C(60)-C(61)-C(62) | 176.75(18)  |
| C(60)-C(61)-C(62)-C(63) | 0.2(3)      |
| C(61)-C(62)-C(63)-C(64) | 1.3(3)      |
| C(62)-C(63)-C(64)-C(65) | -1.5(3)     |
| C(63)-C(64)-C(65)-C(60) | 0.1(3)      |
| C(61)-C(60)-C(65)-C(64) | 1.4(3)      |
| C(59)-C(60)-C(65)-C(64) | -176.9(2)   |

## B. Silacycle 21

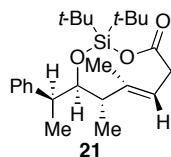

X-ray Data Collection, Structure Solution and Refinement for **21**.

A colorless crystal of approximate dimensions 0.13 x 0.21 x 0.25 mm was mounted on a glass fiber and transferred to a Bruker SMART APEX II diffractometer. The APEX2<sup>1</sup> program package was used to determine the unit-cell parameters and for data collection (25 sec/frame scan time for a sphere of diffraction data). The raw frame data was processed using SAINT<sup>2</sup> and SADABS<sup>3</sup> to yield the reflection data file. Subsequent calculations were carried out using the SHELXTL<sup>4</sup> program. There were no systematic absences nor any diffraction symmetry other than the Friedel condition. The centrosymmetric triclinic space group  $P\bar{1}$  was assigned and later determined to be correct.

The structure was solved by direct methods and refined on  $F^2$  by full-matrix least-squares techniques. The analytical scattering factors<sup>5</sup> for neutral atoms were used throughout the analysis. Hydrogen atoms were located from a difference-Fourier map and refined ( $x,y,z$  and  $U_{\text{iso}}$ ).

At convergence,  $wR2 = 0.0931$  and  $Goof = 1.043$  for 405 variables refined against 5135 data ( $0.78\text{\AA}$ ),  $R1 = 0.0340$  for those 4614 data with  $I > 2.0\sigma(I)$ .

## References.

7. APEX2 Version 2008.3-0, Bruker AXS, Inc.; Madison, WI 2008.
  8. SAINT Version 7.53a, Bruker AXS, Inc.; Madison, WI 2007.
  9. Sheldrick, G. M. SADABS, Version 2007/4, Bruker AXS, Inc.; Madison, WI 2007.
  10. Sheldrick, G. M. SHELXTL, Version 2008/4, Bruker AXS, Inc.; Madison, WI 2008.
  11. International Tables for X-Ray Crystallography 1992, Vol. C., Dordrecht: Kluwer Academic Publishers.
- 

## Definitions:

$$wR2 = [\Sigma[w(F_o^2 - F_c^2)^2] / \Sigma[w(F_o^2)^2]]^{1/2}$$

$$R1 = \Sigma||F_o| - |F_c|| / \Sigma|F_o|$$

Goof =  $S = [\Sigma[w(F_o^2 - F_c^2)^2] / (n-p)]^{1/2}$  where n is the number of reflections and p is the total number of parameters refined.

The thermal ellipsoid plot is shown at the 50% probability level.

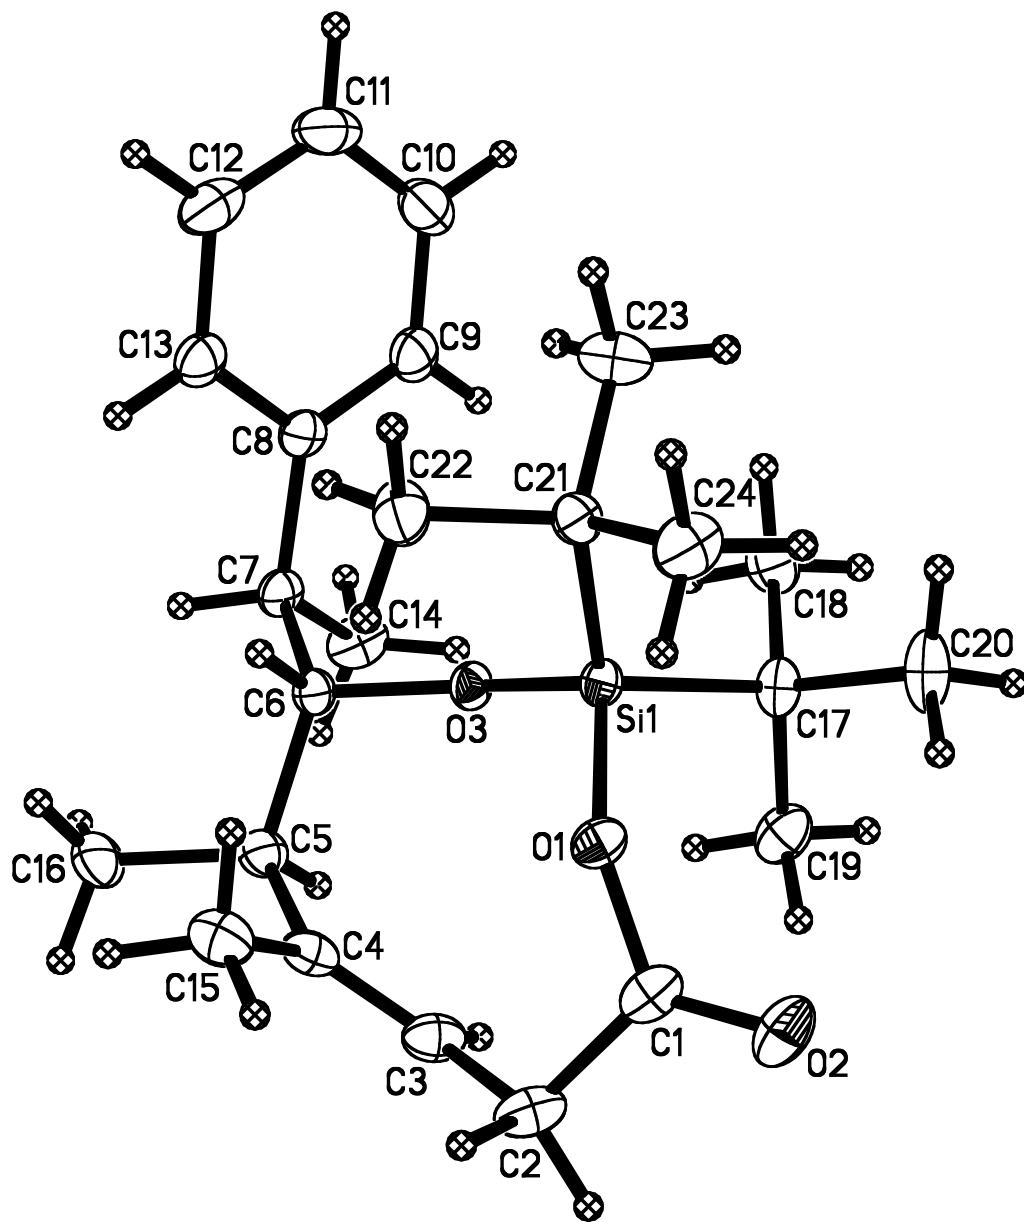

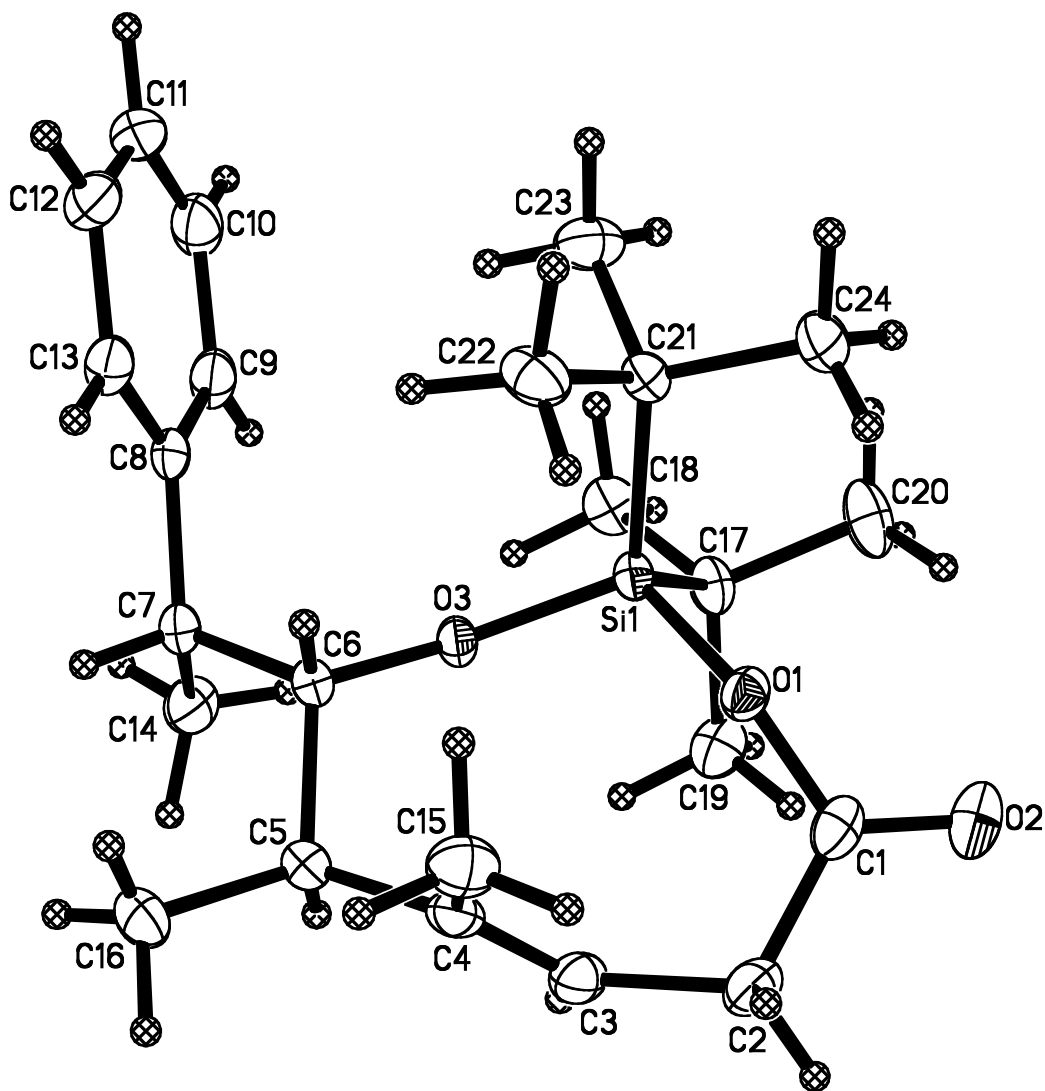Table 1. Crystal data and structure refinement for **21**.

|                     |                                                   |
|---------------------|---------------------------------------------------|
| Identification code | <b>21</b> (Christian Ventocilla)                  |
| Empirical formula   | C <sub>24</sub> H <sub>38</sub> O <sub>3</sub> Si |
| Formula weight      | 402.63                                            |
| Temperature         | 103(2) K                                          |
| Wavelength          | 0.71073 Å                                         |
| Crystal system      | Triclinic                                         |
| Space group         | $P\bar{1}$                                        |

|                                         |                                             |                   |
|-----------------------------------------|---------------------------------------------|-------------------|
| Unit cell dimensions                    | a = 9.5046(6) Å                             | β = 76.7490(10)°. |
|                                         | b = 10.9462(6) Å                            | γ = 84.1220(10)°. |
|                                         | c = 11.6723(7) Å                            | α = 88.0320(10)°. |
| Volume                                  | 1175.76(12) Å <sup>3</sup>                  |                   |
| Z                                       | 2                                           |                   |
| Density (calculated)                    | 1.137 Mg/m <sup>3</sup>                     |                   |
| Absorption coefficient                  | 0.120 mm <sup>-1</sup>                      |                   |
| F(000)                                  | 440                                         |                   |
| Crystal color                           | colorless                                   |                   |
| Crystal size                            | 0.25 x 0.21 x 0.13 mm <sup>3</sup>          |                   |
| Theta range for data collection         | 1.80 to 27.10°                              |                   |
| Index ranges                            | -12 ≤ h ≤ 12, -14 ≤ k ≤ 14, -14 ≤ l ≤ 14    |                   |
| Reflections collected                   | 13579                                       |                   |
| Independent reflections                 | 5135 [R(int) = 0.0152]                      |                   |
| Completeness to theta = 25.50°          | 99.7 %                                      |                   |
| Absorption correction                   | Semi-empirical from equivalents             |                   |
| Max. and min. transmission              | 0.9845 and 0.9705                           |                   |
| Refinement method                       | Full-matrix least-squares on F <sup>2</sup> |                   |
| Data / restraints / parameters          | 5135 / 0 / 405                              |                   |
| Goodness-of-fit on F <sup>2</sup>       | 1.043                                       |                   |
| Final R indices [I > 2σ(I) = 4614 data] | R1 = 0.0340, wR2 = 0.0901                   |                   |
| R indices (all data, 0.78Å)             | R1 = 0.0379, wR2 = 0.0931                   |                   |
| Largest diff. peak and hole             | 0.389 and -0.197 e.Å <sup>-3</sup>          |                   |

Table 2. Atomic coordinates ( $\times 10^4$ ) and equivalent isotropic displacement parameters ( $\text{\AA}^2 \times 10^3$ ) for **21**.  $U(\text{eq})$  is defined as one third of the trace of the orthogonalized  $U^{ij}$  tensor.

|       | x        | y       | z        | U(eq) |
|-------|----------|---------|----------|-------|
| Si(1) | 2162(1)  | 1839(1) | 6790(1)  | 16(1) |
| O(1)  | 1069(1)  | 1192(1) | 6070(1)  | 20(1) |
| O(2)  | 1226(1)  | 919(1)  | 4227(1)  | 29(1) |
| O(3)  | 1429(1)  | 3002(1) | 7301(1)  | 17(1) |
| C(1)  | 596(1)   | 1349(1) | 4997(1)  | 23(1) |
| C(2)  | -822(2)  | 2030(1) | 4876(1)  | 27(1) |
| C(3)  | -953(1)  | 3028(1) | 5574(1)  | 24(1) |
| C(4)  | -1375(1) | 2832(1) | 6721(1)  | 21(1) |
| C(5)  | -1020(1) | 3792(1) | 7392(1)  | 21(1) |
| C(6)  | 270(1)   | 3293(1) | 8083(1)  | 17(1) |
| C(7)  | 785(1)   | 4242(1) | 8742(1)  | 19(1) |
| C(8)  | 1847(1)  | 3637(1) | 9598(1)  | 20(1) |
| C(9)  | 3282(1)  | 3925(1) | 9426(1)  | 25(1) |
| C(10) | 4192(1)  | 3371(1) | 10266(1) | 33(1) |
| C(11) | 3686(2)  | 2522(1) | 11280(1) | 36(1) |
| C(12) | 2268(2)  | 2213(1) | 11463(1) | 32(1) |
| C(13) | 1358(1)  | 2772(1) | 10627(1) | 24(1) |
| C(14) | 1288(2)  | 5462(1) | 7896(1)  | 27(1) |
| C(15) | -2047(1) | 1636(1) | 7436(1)  | 28(1) |
| C(16) | -2266(1) | 4115(1) | 8222(1)  | 29(1) |
| C(17) | 3633(1)  | 2634(1) | 5686(1)  | 22(1) |
| C(18) | 4573(1)  | 3385(1) | 6270(1)  | 27(1) |
| C(19) | 2986(2)  | 3570(1) | 4672(1)  | 27(1) |
| C(20) | 4566(2)  | 1683(1) | 5156(1)  | 33(1) |
| C(21) | 2621(1)  | 423(1)  | 7976(1)  | 19(1) |
| C(22) | 1360(1)  | 101(1)  | 8923(1)  | 28(1) |
| C(23) | 3898(2)  | 652(1)  | 8603(1)  | 30(1) |
| C(24) | 2928(2)  | -732(1) | 7442(1)  | 29(1) |

Table 3. Bond lengths [Å] and angles [°] for **21**.

---

|              |            |
|--------------|------------|
| Si(1)-O(3)   | 1.6324(8)  |
| Si(1)-O(1)   | 1.6696(8)  |
| Si(1)-C(17)  | 1.8901(12) |
| Si(1)-C(21)  | 1.8990(11) |
| O(1)-C(1)    | 1.3460(14) |
| O(2)-C(1)    | 1.2052(15) |
| O(3)-C(6)    | 1.4319(12) |
| C(1)-C(2)    | 1.5209(18) |
| C(2)-C(3)    | 1.5004(16) |
| C(2)-H(2A)   | 1.026(17)  |
| C(2)-H(2B)   | 1.001(16)  |
| C(3)-C(4)    | 1.3278(17) |
| C(3)-H(3A)   | 0.974(15)  |
| C(4)-C(15)   | 1.5052(17) |
| C(4)-C(5)    | 1.5124(16) |
| C(5)-C(16)   | 1.5362(16) |
| C(5)-C(6)    | 1.5512(15) |
| C(5)-H(5A)   | 0.980(15)  |
| C(6)-C(7)    | 1.5458(15) |
| C(6)-H(6A)   | 0.989(13)  |
| C(7)-C(8)    | 1.5212(15) |
| C(7)-C(14)   | 1.5264(17) |
| C(7)-H(7A)   | 0.955(14)  |
| C(8)-C(9)    | 1.3940(17) |
| C(8)-C(13)   | 1.3963(17) |
| C(9)-C(10)   | 1.3937(19) |
| C(9)-H(9A)   | 0.940(16)  |
| C(10)-C(11)  | 1.381(2)   |
| C(10)-H(10A) | 0.978(19)  |
| C(11)-C(12)  | 1.384(2)   |
| C(11)-H(11A) | 0.950(18)  |
| C(12)-C(13)  | 1.3921(18) |
| C(12)-H(12A) | 0.958(17)  |
| C(13)-H(13A) | 0.965(15)  |



|                  |            |
|------------------|------------|
| C(14)-H(14A)     | 0.964(16)  |
| C(14)-H(14B)     | 0.977(16)  |
| C(14)-H(14C)     | 1.001(17)  |
| C(15)-H(15A)     | 0.96(2)    |
| C(15)-H(15B)     | 0.98(2)    |
| C(15)-H(15C)     | 0.96(2)    |
| C(16)-H(16A)     | 0.964(17)  |
| C(16)-H(16B)     | 0.968(17)  |
| C(16)-H(16C)     | 0.967(17)  |
| C(17)-C(20)      | 1.5398(16) |
| C(17)-C(18)      | 1.5403(17) |
| C(17)-C(19)      | 1.5424(17) |
| C(18)-H(18A)     | 0.961(17)  |
| C(18)-H(18B)     | 1.010(16)  |
| C(18)-H(18C)     | 0.961(18)  |
| C(19)-H(19A)     | 0.962(17)  |
| C(19)-H(19B)     | 0.970(18)  |
| C(19)-H(19C)     | 0.992(16)  |
| C(20)-H(20A)     | 0.982(17)  |
| C(20)-H(20B)     | 0.993(17)  |
| C(20)-H(20C)     | 0.973(17)  |
| C(21)-C(23)      | 1.5346(16) |
| C(21)-C(22)      | 1.5367(16) |
| C(21)-C(24)      | 1.5400(16) |
| C(22)-H(22A)     | 0.975(17)  |
| C(22)-H(22B)     | 1.035(17)  |
| C(22)-H(22C)     | 0.985(18)  |
| C(23)-H(23A)     | 0.985(17)  |
| C(23)-H(23B)     | 0.971(17)  |
| C(23)-H(23C)     | 0.952(17)  |
| C(24)-H(21A)     | 0.987(17)  |
| C(24)-H(21B)     | 0.961(18)  |
| C(24)-H(21C)     | 0.99(2)    |
| O(3)-Si(1)-O(1)  | 112.73(4)  |
| O(3)-Si(1)-C(17) | 102.66(5)  |

|                   |            |
|-------------------|------------|
| O(1)-Si(1)-C(17)  | 108.33(5)  |
| O(3)-Si(1)-C(21)  | 114.28(5)  |
| O(1)-Si(1)-C(21)  | 100.65(5)  |
| C(17)-Si(1)-C(21) | 118.43(5)  |
| C(1)-O(1)-Si(1)   | 140.92(7)  |
| C(6)-O(3)-Si(1)   | 141.87(7)  |
| O(2)-C(1)-O(1)    | 121.64(11) |
| O(2)-C(1)-C(2)    | 123.70(11) |
| O(1)-C(1)-C(2)    | 114.55(10) |
| C(3)-C(2)-C(1)    | 110.70(10) |
| C(3)-C(2)-H(2A)   | 110.8(9)   |
| C(1)-C(2)-H(2A)   | 105.4(9)   |
| C(3)-C(2)-H(2B)   | 113.9(9)   |
| C(1)-C(2)-H(2B)   | 107.4(9)   |
| H(2A)-C(2)-H(2B)  | 108.2(13)  |
| C(4)-C(3)-C(2)    | 124.80(11) |
| C(4)-C(3)-H(3A)   | 118.1(8)   |
| C(2)-C(3)-H(3A)   | 115.8(8)   |
| C(3)-C(4)-C(15)   | 123.82(11) |
| C(3)-C(4)-C(5)    | 118.82(11) |
| C(15)-C(4)-C(5)   | 116.98(10) |
| C(4)-C(5)-C(16)   | 113.49(10) |
| C(4)-C(5)-C(6)    | 108.17(9)  |
| C(16)-C(5)-C(6)   | 111.12(9)  |
| C(4)-C(5)-H(5A)   | 107.5(8)   |
| C(16)-C(5)-H(5A)  | 109.6(8)   |
| C(6)-C(5)-H(5A)   | 106.7(8)   |
| O(3)-C(6)-C(7)    | 108.22(9)  |
| O(3)-C(6)-C(5)    | 110.70(8)  |
| C(7)-C(6)-C(5)    | 112.55(9)  |
| O(3)-C(6)-H(6A)   | 108.9(7)   |
| C(7)-C(6)-H(6A)   | 108.8(7)   |
| C(5)-C(6)-H(6A)   | 107.6(7)   |
| C(8)-C(7)-C(14)   | 114.15(10) |
| C(8)-C(7)-C(6)    | 111.19(9)  |
| C(14)-C(7)-C(6)   | 112.16(9)  |

|                     |            |
|---------------------|------------|
| C(8)-C(7)-H(7A)     | 106.9(8)   |
| C(14)-C(7)-H(7A)    | 106.5(8)   |
| C(6)-C(7)-H(7A)     | 105.2(9)   |
| C(9)-C(8)-C(13)     | 118.06(11) |
| C(9)-C(8)-C(7)      | 123.44(11) |
| C(13)-C(8)-C(7)     | 118.48(10) |
| C(10)-C(9)-C(8)     | 120.61(12) |
| C(10)-C(9)-H(9A)    | 119.8(9)   |
| C(8)-C(9)-H(9A)     | 119.6(9)   |
| C(11)-C(10)-C(9)    | 120.46(13) |
| C(11)-C(10)-H(10A)  | 119.0(10)  |
| C(9)-C(10)-H(10A)   | 120.5(10)  |
| C(10)-C(11)-C(12)   | 119.87(12) |
| C(10)-C(11)-H(11A)  | 119.8(11)  |
| C(12)-C(11)-H(11A)  | 120.3(11)  |
| C(11)-C(12)-C(13)   | 119.64(13) |
| C(11)-C(12)-H(12A)  | 121.1(10)  |
| C(13)-C(12)-H(12A)  | 119.3(10)  |
| C(12)-C(13)-C(8)    | 121.36(12) |
| C(12)-C(13)-H(13A)  | 120.1(9)   |
| C(8)-C(13)-H(13A)   | 118.5(9)   |
| C(7)-C(14)-H(14A)   | 110.8(9)   |
| C(7)-C(14)-H(14B)   | 112.3(9)   |
| H(14A)-C(14)-H(14B) | 106.7(13)  |
| C(7)-C(14)-H(14C)   | 109.4(10)  |
| H(14A)-C(14)-H(14C) | 109.8(13)  |
| H(14B)-C(14)-H(14C) | 107.6(13)  |
| C(4)-C(15)-H(15A)   | 112.5(11)  |
| C(4)-C(15)-H(15B)   | 109.3(11)  |
| H(15A)-C(15)-H(15B) | 109.4(16)  |
| C(4)-C(15)-H(15C)   | 111.7(11)  |
| H(15A)-C(15)-H(15C) | 108.0(16)  |
| H(15B)-C(15)-H(15C) | 105.7(15)  |
| C(5)-C(16)-H(16A)   | 112.2(10)  |
| C(5)-C(16)-H(16B)   | 111.2(10)  |
| H(16A)-C(16)-H(16B) | 107.6(13)  |

|                     |            |
|---------------------|------------|
| C(5)-C(16)-H(16C)   | 111.1(10)  |
| H(16A)-C(16)-H(16C) | 107.6(13)  |
| H(16B)-C(16)-H(16C) | 106.8(14)  |
| C(20)-C(17)-C(18)   | 108.81(11) |
| C(20)-C(17)-C(19)   | 108.64(10) |
| C(18)-C(17)-C(19)   | 107.46(10) |
| C(20)-C(17)-Si(1)   | 111.93(8)  |
| C(18)-C(17)-Si(1)   | 110.63(8)  |
| C(19)-C(17)-Si(1)   | 109.24(8)  |
| C(17)-C(18)-H(18A)  | 109.1(9)   |
| C(17)-C(18)-H(18B)  | 111.2(9)   |
| H(18A)-C(18)-H(18B) | 107.7(13)  |
| C(17)-C(18)-H(18C)  | 112.6(10)  |
| H(18A)-C(18)-H(18C) | 107.9(14)  |
| H(18B)-C(18)-H(18C) | 108.2(13)  |
| C(17)-C(19)-H(19A)  | 111.9(10)  |
| C(17)-C(19)-H(19B)  | 108.5(10)  |
| H(19A)-C(19)-H(19B) | 105.9(13)  |
| C(17)-C(19)-H(19C)  | 112.5(9)   |
| H(19A)-C(19)-H(19C) | 109.6(13)  |
| H(19B)-C(19)-H(19C) | 108.3(13)  |
| C(17)-C(20)-H(20A)  | 111.9(9)   |
| C(17)-C(20)-H(20B)  | 109.1(10)  |
| H(20A)-C(20)-H(20B) | 106.6(13)  |
| C(17)-C(20)-H(20C)  | 112.5(10)  |
| H(20A)-C(20)-H(20C) | 109.8(13)  |
| H(20B)-C(20)-H(20C) | 106.7(13)  |
| C(23)-C(21)-C(22)   | 107.47(10) |
| C(23)-C(21)-C(24)   | 109.09(10) |
| C(22)-C(21)-C(24)   | 107.31(10) |
| C(23)-C(21)-Si(1)   | 112.56(8)  |
| C(22)-C(21)-Si(1)   | 109.77(8)  |
| C(24)-C(21)-Si(1)   | 110.47(8)  |
| C(21)-C(22)-H(22A)  | 107.1(9)   |
| C(21)-C(22)-H(22B)  | 112.1(9)   |
| H(22A)-C(22)-H(22B) | 109.5(13)  |

|                     |           |
|---------------------|-----------|
| C(21)-C(22)-H(22C)  | 111.2(10) |
| H(22A)-C(22)-H(22C) | 108.7(14) |
| H(22B)-C(22)-H(22C) | 108.1(13) |
| C(21)-C(23)-H(23A)  | 112.5(9)  |
| C(21)-C(23)-H(23B)  | 109.2(10) |
| H(23A)-C(23)-H(23B) | 107.1(13) |
| C(21)-C(23)-H(23C)  | 111.8(10) |
| H(23A)-C(23)-H(23C) | 107.0(14) |
| H(23B)-C(23)-H(23C) | 109.1(14) |
| C(21)-C(24)-H(21A)  | 109.4(9)  |
| C(21)-C(24)-H(21B)  | 112.6(10) |
| H(21A)-C(24)-H(21B) | 107.3(13) |
| C(21)-C(24)-H(21C)  | 111.6(11) |
| H(21A)-C(24)-H(21C) | 106.8(14) |
| H(21B)-C(24)-H(21C) | 108.9(14) |

---

Table 4. Anisotropic displacement parameters ( $\text{\AA}^2 \times 10^3$ ) for **21**. The anisotropic displacement factor exponent takes the form:  $-2\pi^2 [ h^2 a^{*2} U^{11} + \dots + 2 h k a^* b^* U^{12} ]$

|       | U <sup>11</sup> | U <sup>22</sup> | U <sup>33</sup> | U <sup>23</sup> | U <sup>13</sup> | U <sup>12</sup> |
|-------|-----------------|-----------------|-----------------|-----------------|-----------------|-----------------|
| Si(1) | 17(1)           | 15(1)           | 16(1)           | -6(1)           | 0(1)            | 1(1)            |
| O(1)  | 25(1)           | 18(1)           | 18(1)           | -6(1)           | -4(1)           | -1(1)           |
| O(2)  | 41(1)           | 26(1)           | 22(1)           | -10(1)          | 3(1)            | -9(1)           |
| O(3)  | 18(1)           | 18(1)           | 18(1)           | -8(1)           | 0(1)            | 1(1)            |
| C(1)  | 33(1)           | 16(1)           | 19(1)           | -4(1)           | -2(1)           | -8(1)           |
| C(2)  | 40(1)           | 21(1)           | 23(1)           | -6(1)           | -12(1)          | 1(1)            |
| C(3)  | 28(1)           | 19(1)           | 26(1)           | -6(1)           | -10(1)          | 2(1)            |
| C(4)  | 18(1)           | 20(1)           | 27(1)           | -6(1)           | -8(1)           | 4(1)            |
| C(5)  | 20(1)           | 21(1)           | 22(1)           | -7(1)           | -4(1)           | 4(1)            |
| C(6)  | 18(1)           | 18(1)           | 17(1)           | -6(1)           | -1(1)           | 3(1)            |
| C(7)  | 22(1)           | 19(1)           | 18(1)           | -8(1)           | -2(1)           | 3(1)            |
| C(8)  | 23(1)           | 20(1)           | 19(1)           | -11(1)          | -3(1)           | 4(1)            |
| C(9)  | 25(1)           | 30(1)           | 24(1)           | -13(1)          | 0(1)            | 0(1)            |
| C(10) | 23(1)           | 47(1)           | 37(1)           | -24(1)          | -8(1)           | 7(1)            |
| C(11) | 40(1)           | 43(1)           | 30(1)           | -17(1)          | -17(1)          | 18(1)           |
| C(12) | 47(1)           | 30(1)           | 20(1)           | -6(1)           | -6(1)           | 8(1)            |
| C(13) | 28(1)           | 25(1)           | 20(1)           | -9(1)           | -1(1)           | 1(1)            |
| C(14) | 39(1)           | 18(1)           | 27(1)           | -6(1)           | -7(1)           | 0(1)            |
| C(15) | 25(1)           | 28(1)           | 32(1)           | -5(1)           | -7(1)           | -2(1)           |
| C(16) | 21(1)           | 38(1)           | 32(1)           | -16(1)          | -3(1)           | 9(1)            |
| C(17) | 22(1)           | 19(1)           | 23(1)           | -7(1)           | 4(1)            | -1(1)           |
| C(18) | 22(1)           | 25(1)           | 32(1)           | -7(1)           | 0(1)            | -4(1)           |
| C(19) | 34(1)           | 25(1)           | 21(1)           | -2(1)           | 1(1)            | -7(1)           |
| C(20) | 33(1)           | 28(1)           | 38(1)           | -13(1)          | 15(1)           | -1(1)           |
| C(21) | 20(1)           | 17(1)           | 20(1)           | -5(1)           | -2(1)           | 2(1)            |
| C(22) | 27(1)           | 24(1)           | 26(1)           | 4(1)            | 3(1)            | 4(1)            |
| C(23) | 31(1)           | 26(1)           | 34(1)           | -3(1)           | -14(1)          | -1(1)           |
| C(24) | 42(1)           | 20(1)           | 28(1)           | -8(1)           | -6(1)           | 8(1)            |

Table 5. Hydrogen coordinates ( $\times 10^4$ ) and isotropic displacement parameters ( $\text{\AA}^2 \times 10^{-3}$ ) for **21**.

|        | x         | y         | z         | U(eq) |
|--------|-----------|-----------|-----------|-------|
| H(2A)  | -1570(17) | 1351(16)  | 5199(14)  | 35(4) |
| H(2B)  | -907(17)  | 2355(15)  | 4012(14)  | 34(4) |
| H(3A)  | -513(15)  | 3827(14)  | 5186(13)  | 25(4) |
| H(5A)  | -709(15)  | 4552(14)  | 6807(13)  | 23(3) |
| H(6A)  | -23(13)   | 2516(12)  | 8668(11)  | 13(3) |
| H(7A)  | -34(15)   | 4452(13)  | 9207(12)  | 22(3) |
| H(9A)  | 3633(16)  | 4512(15)  | 8744(14)  | 31(4) |
| H(10A) | 5200(20)  | 3573(16)  | 10144(15) | 45(5) |
| H(11A) | 4314(19)  | 2155(17)  | 11850(15) | 43(5) |
| H(12A) | 1896(17)  | 1631(16)  | 12164(15) | 37(4) |
| H(13A) | 367(16)   | 2567(14)  | 10752(12) | 25(4) |
| H(14A) | 1996(17)  | 5295(15)  | 7296(14)  | 32(4) |
| H(14B) | 1717(16)  | 6024(15)  | 8299(14)  | 31(4) |
| H(14C) | 463(18)   | 5917(16)  | 7516(14)  | 37(4) |
| H(15A) | -2290(20) | 1089(18)  | 6949(17)  | 51(5) |
| H(15B) | -2900(20) | 1841(18)  | 7907(17)  | 56(5) |
| H(15C) | -1440(20) | 1177(18)  | 7997(17)  | 52(5) |
| H(16A) | -2119(17) | 4883(16)  | 8462(14)  | 34(4) |
| H(16B) | -2419(17) | 3455(16)  | 8931(15)  | 36(4) |
| H(16C) | -3136(18) | 4211(15)  | 7845(14)  | 36(4) |
| H(18A) | 5336(17)  | 3750(15)  | 5702(14)  | 34(4) |
| H(18B) | 4023(17)  | 4093(15)  | 6536(14)  | 34(4) |
| H(18C) | 4979(18)  | 2873(16)  | 6941(15)  | 41(4) |
| H(19A) | 2469(17)  | 3151(15)  | 4211(14)  | 34(4) |
| H(19B) | 3751(18)  | 4002(16)  | 4132(15)  | 40(4) |
| H(19C) | 2368(17)  | 4208(15)  | 4958(13)  | 31(4) |
| H(20A) | 4012(17)  | 1179(16)  | 4773(14)  | 35(4) |
| H(20B) | 5269(18)  | 2145(16)  | 4533(15)  | 37(4) |
| H(20C) | 5102(18)  | 1133(16)  | 5740(15)  | 37(4) |
| H(21A) | 3120(17)  | -1468(16) | 8077(14)  | 33(4) |

|        |          |          |          |       |
|--------|----------|----------|----------|-------|
| H(21B) | 3740(19) | -624(16) | 6867(15) | 39(4) |
| H(21C) | 2100(20) | -944(18) | 7072(16) | 51(5) |
| H(22A) | 1603(17) | -676(16) | 9469(14) | 35(4) |
| H(22B) | 1146(17) | 800(16)  | 9383(15) | 39(4) |
| H(22C) | 498(19)  | -34(16)  | 8568(15) | 40(4) |
| H(23A) | 4780(18) | 768(15)  | 8070(14) | 37(4) |
| H(23B) | 4040(17) | -72(16)  | 9240(15) | 38(4) |
| H(23C) | 3766(17) | 1380(16) | 8920(14) | 37(4) |

---



Table 6. Torsion angles [°] for **21**.

---

|                       |             |
|-----------------------|-------------|
| O(3)-Si(1)-O(1)-C(1)  | 83.76(13)   |
| C(17)-Si(1)-O(1)-C(1) | -29.14(13)  |
| C(21)-Si(1)-O(1)-C(1) | -154.07(12) |
| O(1)-Si(1)-O(3)-C(6)  | 59.92(12)   |
| C(17)-Si(1)-O(3)-C(6) | 176.25(11)  |
| C(21)-Si(1)-O(3)-C(6) | -54.22(12)  |
| Si(1)-O(1)-C(1)-O(2)  | 86.27(15)   |
| Si(1)-O(1)-C(1)-C(2)  | -97.41(14)  |
| O(2)-C(1)-C(2)-C(3)   | -148.03(12) |
| O(1)-C(1)-C(2)-C(3)   | 35.73(14)   |
| C(1)-C(2)-C(3)-C(4)   | -84.13(15)  |
| C(2)-C(3)-C(4)-C(15)  | -12.21(19)  |
| C(2)-C(3)-C(4)-C(5)   | 160.46(11)  |
| C(3)-C(4)-C(5)-C(16)  | 135.41(12)  |
| C(15)-C(4)-C(5)-C(16) | -51.42(14)  |
| C(3)-C(4)-C(5)-C(6)   | -100.80(12) |
| C(15)-C(4)-C(5)-C(6)  | 72.37(13)   |
| Si(1)-O(3)-C(6)-C(7)  | 141.52(10)  |
| Si(1)-O(3)-C(6)-C(5)  | -94.69(12)  |
| C(4)-C(5)-C(6)-O(3)   | 55.16(12)   |
| C(16)-C(5)-C(6)-O(3)  | -179.64(10) |
| C(4)-C(5)-C(6)-C(7)   | 176.42(9)   |
| C(16)-C(5)-C(6)-C(7)  | -58.38(13)  |
| O(3)-C(6)-C(7)-C(8)   | -68.56(11)  |
| C(5)-C(6)-C(7)-C(8)   | 168.78(9)   |
| O(3)-C(6)-C(7)-C(14)  | 60.62(12)   |
| C(5)-C(6)-C(7)-C(14)  | -62.04(13)  |
| C(14)-C(7)-C(8)-C(9)  | -18.21(15)  |
| C(6)-C(7)-C(8)-C(9)   | 109.89(12)  |
| C(14)-C(7)-C(8)-C(13) | 160.02(10)  |
| C(6)-C(7)-C(8)-C(13)  | -71.87(13)  |
| C(13)-C(8)-C(9)-C(10) | -0.60(17)   |
| C(7)-C(8)-C(9)-C(10)  | 177.64(11)  |
| C(8)-C(9)-C(10)-C(11) | 0.28(19)    |

|                         |             |
|-------------------------|-------------|
| C(9)-C(10)-C(11)-C(12)  | 0.4(2)      |
| C(10)-C(11)-C(12)-C(13) | -0.6(2)     |
| C(11)-C(12)-C(13)-C(8)  | 0.31(19)    |
| C(9)-C(8)-C(13)-C(12)   | 0.31(17)    |
| C(7)-C(8)-C(13)-C(12)   | -178.02(11) |
| O(3)-Si(1)-C(17)-C(20)  | 175.14(9)   |
| O(1)-Si(1)-C(17)-C(20)  | -65.41(10)  |
| C(21)-Si(1)-C(17)-C(20) | 48.22(11)   |
| O(3)-Si(1)-C(17)-C(18)  | 53.60(9)    |
| O(1)-Si(1)-C(17)-C(18)  | 173.05(8)   |
| C(21)-Si(1)-C(17)-C(18) | -73.32(9)   |
| O(3)-Si(1)-C(17)-C(19)  | -64.50(9)   |
| O(1)-Si(1)-C(17)-C(19)  | 54.95(9)    |
| C(21)-Si(1)-C(17)-C(19) | 168.58(8)   |
| O(3)-Si(1)-C(21)-C(23)  | -72.84(10)  |
| O(1)-Si(1)-C(21)-C(23)  | 166.08(9)   |
| C(17)-Si(1)-C(21)-C(23) | 48.33(10)   |
| O(3)-Si(1)-C(21)-C(22)  | 46.82(10)   |
| O(1)-Si(1)-C(21)-C(22)  | -74.26(9)   |
| C(17)-Si(1)-C(21)-C(22) | 167.98(8)   |
| O(3)-Si(1)-C(21)-C(24)  | 164.95(8)   |
| O(1)-Si(1)-C(21)-C(24)  | 43.87(9)    |
| C(17)-Si(1)-C(21)-C(24) | -73.88(10)  |

---

## VII. Bibliography

- (1) Driver, T. G.; Franz, A. K.; Woerpel, K. A. *J. Am. Chem. Soc.* **2002**, *124*, 6524–6525.
- (2) Ahmed, M. M.; Mortensen, M. S.; O'Doherty, G. A. *J. Org. Chem.* **2006**, *71*, 7741–7746.
- (3) Marcus, A. P.; Lee, A. S.; Davis, R. L.; Tantillo, D. J.; Sarpong, R. *Angew. Chem. Int. Ed.* **2008**, *47*, 6379–6383.
- (4) Taillefumier, C.; Chapleur, Y. *Can. J. Chem.* **2000**, *78*, 708–722.
